# Supplementary material for: Functional analysis of C1 family cysteine peptidases in the larval gut of Тenebrio molitor and Tribolium castaneum
Source: PubMed Central journal article supplement (PMC4336737; doi:10.1186/s12864-015-1306-x), 2015-02-14
Supplement: 12864_2015_1306_MOESM2_ESM.pdf [file 12864_2015_1306_MOESM2_ESM.pdf]

|                      | 10                                                                                              | 20 | 30 | 40 | 50 | 60 | 70 | 80 |
|----------------------|-------------------------------------------------------------------------------------------------|----|----|----|----|----|----|----|
|                      | -----MKTLLVLLALCL-----                                                                          |    |    |    |    |    |    |    |
| *TmL30               | -----MKCFILLTATF-----                                                                           |    |    |    |    |    |    |    |
| *TmL29               | -----MKILWILSLVL-----                                                                           |    |    |    |    |    |    |    |
| *TcL_XP_970773       | -----                                                                                           |    |    |    |    |    |    |    |
| TmL13                | -----MKTLLVLCCLAF-----                                                                          |    |    |    |    |    |    |    |
| TcL_NP_001164001     | -----MKTFFIVLALAV-----                                                                          |    |    |    |    |    |    |    |
| TcL_NP_001164314     | -----MKTFFIVLALAV-----                                                                          |    |    |    |    |    |    |    |
| TmL1                 | -----MKTFFVLSLAI-----                                                                           |    |    |    |    |    |    |    |
| HsCathL2             | -----MNLVLVLAALFCL-----                                                                         |    |    |    |    |    |    |    |
| HsCathL1             | -----MNPTLLVLAALFCL-----                                                                        |    |    |    |    |    |    |    |
| TmL3                 | -----MKFLIFLAICV-----                                                                           |    |    |    |    |    |    |    |
| TmL2                 | -----MKFLIFLAICV-----                                                                           |    |    |    |    |    |    |    |
| TcL_XP_970644        | -----MKFLVLFVALCV-----                                                                          |    |    |    |    |    |    |    |
| <u>TcL_XP_970951</u> | -----MKTGLVVFVATVV-----                                                                         |    |    |    |    |    |    |    |
| TcL_XP_971752        | -----MKVLTLVVL-----                                                                             |    |    |    |    |    |    |    |
| TmL15                | -----MKILVLLLSL-----                                                                            |    |    |    |    |    |    |    |
| TmL6                 | -----MKILVLLVSL-----                                                                            |    |    |    |    |    |    |    |
| TcL_XP_971867        | -----MRTLVLVLLVL-----                                                                           |    |    |    |    |    |    |    |
| TcL_XP_971975        | -----MHTLAVLLLCAL-----                                                                          |    |    |    |    |    |    |    |
| TcL_XP_969833        | -----MHTLAVLLLCAL-----                                                                          |    |    |    |    |    |    |    |
| TmL5                 | -----MKVFIIAIAI-----                                                                            |    |    |    |    |    |    |    |
| TmL4                 | -----MKVLVILAITI-----                                                                           |    |    |    |    |    |    |    |
| TcL_XP_971698        | -----MKVFIIALAI-----                                                                            |    |    |    |    |    |    |    |
| TmL9                 | -----MKPQLLFFVFL-----                                                                           |    |    |    |    |    |    |    |
| TmL8                 | -----MKWFLLIVSI-----                                                                            |    |    |    |    |    |    |    |
| TmL7                 | -----MKLLLLFVSI-----                                                                            |    |    |    |    |    |    |    |
| TmL11                | --MGTVVKSVIFSCFLTLVYGDCAVTAPVWSNHTHTVKGILYIPYAEIEEPFYAWYDGPSSKRSRIDYYGDMVKTYQLSTSG 78           |    |    |    |    |    |    |    |
| TcL_NP_001164088     | --MRMLFKSVIFSCFLALVYGDVCSNKAPAWSNTYTVKGILYIPYAEIEEPFYAWYDQSKRSRIDYYGDMVKTYQLSTEG 78             |    |    |    |    |    |    |    |
| <u>Papain</u>        | MAMIPSISKLLFVAICLFVYM-----                                                                      |    |    |    |    |    |    |    |
| TmF10                | -----MALLRCLFICLCCSLFVNS <del>E</del> VNQENGANAYDSHDAEIAAVLNHLNSTPIKVYNYKQATLINAHTKADITELTLD 74 |    |    |    |    |    |    |    |
| TcF_XP_008195656     | -----MATLWYMFVCFVWVSLVNS <del>D</del> VLQENLSNKSESHSSEISAVLNHLNSSPFKVYNYNKATLLNAQTKADIEELILD 74 |    |    |    |    |    |    |    |
| Tm012                | ---MAPWTTYLQVFFCV-----                                                                          |    |    |    |    |    |    |    |
| <u>TcO_XP_970512</u> | ---MASWSTYLQAIFYI-----                                                                          |    |    |    |    |    |    |    |
| TcK_XP_001814509     | -----MKTILIAL-----                                                                              |    |    |    |    |    |    |    |



|                  | YXSXAXL                                                                           | EXLVEE   |                         |
|------------------|-----------------------------------------------------------------------------------|----------|-------------------------|
|                  | 170                                                                               | 180      | 190 200 210 220 230 240 |
| TmL30            | VVGTLS                                                                            | SEELHP   | 25                      |
| TmL29            | AATATPL                                                                           | SIQK     | 23                      |
| TcL_XP_970773    | MASP                                                                              | QKLIND   | 11                      |
| TmL13            | AATLALP                                                                           | KSPFQE   | 25                      |
| TcL_NP_001164001 | VATLAVP                                                                           | QSPVHA   | 25                      |
| TcL_NP_001164314 | VATLAVP                                                                           | QSPVHA   | 25                      |
| TmL1             | VTTLALP                                                                           | KSPLNE   | 25                      |
| HsCathL2         | GIASAVP                                                                           | KFDQNLDT | 28                      |
| HsCathL1         | GIASATL                                                                           | TFDHSLEA | 28                      |
| TmL3             | AGSQAVS                                                                           | FFDLVQE  | 26                      |
| TmL2             | AGSQAVS                                                                           | FFDLVQE  | 26                      |
| TcL_XP_970644    | VGSQAVS                                                                           | FFDLVQE  | 26                      |
| TcL_XP_970951    | AFAKSQLSIGVTLENLLQE                                                               |          | 32                      |
| TcL_XP_971752    | HTSDAFS                                                                           | LNK      | 21                      |
| TmL15            | YACQASL                                                                           | PESVVPD  | 26                      |
| TmL6             | YTCQAGL                                                                           | PESLISE  | 26                      |
| TcL_XP_971867    | YTSDASS                                                                           | LNE      | 22                      |
| TcL_XP_971975    | YSSQALL                                                                           | PENLVEE  | 26                      |
| TcL_XP_969833    | YSSQALL                                                                           | PENLVEE  | 26                      |
| TmL5             | YGASAAL                                                                           | PSTFVAE  | 26                      |
| TmL4             | YGTSATL                                                                           | SSEFVAE  | 26                      |
| TcL_XP_971698    | YGTSASL                                                                           | SKDFVEE  | 26                      |
| TmL9             | CNCSAGK                                                                           | N        | 21                      |
| TmL8             | SAVFASP                                                                           |          | 19                      |
| TmL7             | NVVFASQ                                                                           |          | 19                      |
| TmL11            | TNARTCLQVNGTSEYTIEP                                                               |          | 114                     |
| TcL_NP_001164088 | TNSRTCLQVNGTEENTIEP                                                               |          | 114                     |
| Papain           | GLSFGDFSIVGYSQNDLTS                                                               |          | 41                      |
| TmF10            | EVGDHFVAVRRESYPCLGCPIDLNPNAEGVDELVDIGLGHIESEREQKQSLVKVLKLQQQVVGSKYILVVEVAPTICAK   |          | 233                     |
| TcF_XP_008195656 | EVGEHFVAVRKDSVPCLGCPFDLNTNAEGVDELIDVALEHIQTERAKKHALVKVLRLLQQQVVTGVKYILTAEFAPTLCEK |          | 234                     |
| Tm012            | ALLFFMIPIKIDGPDLEVEL                                                              |          | 34                      |
| TcO_XP_970512    | ALLFFVIPIRIKGPDAQES                                                               |          | 34                      |
| TcK_XP_001814509 | ATVLAKLAHFHENGASLDE                                                               |          | 29                      |















|                  | 730                    | 740                 | 750 | 760                                    | 770 | 780 | 790 | 800 |     |
|------------------|------------------------|---------------------|-----|----------------------------------------|-----|-----|-----|-----|-----|
| TmL30            | -----                  |                     |     |                                        |     |     |     |     | 25  |
| TmL29            | -----                  |                     |     |                                        |     |     |     |     | 23  |
| TcL_XP_970773    | -----                  |                     |     |                                        |     |     |     |     | 11  |
| TmL13            | -----                  |                     |     |                                        |     |     |     |     | 25  |
| TcL_NP_001164001 | -----                  |                     |     |                                        |     |     |     |     | 25  |
| TcL_NP_001164314 | -----                  |                     |     |                                        |     |     |     |     | 25  |
| TmL1             | -----                  |                     |     |                                        |     |     |     |     | 25  |
| HsCathL2         | -----                  |                     |     |                                        |     |     |     |     | 28  |
| HsCathL1         | -----                  |                     |     |                                        |     |     |     |     | 28  |
| TmL3             | -----                  |                     |     |                                        |     |     |     |     | 26  |
| TmL2             | -----                  |                     |     |                                        |     |     |     |     | 26  |
| TcL_XP_970644    | -----                  |                     |     |                                        |     |     |     |     | 26  |
| TcL_XP_970951    | -----                  |                     |     |                                        |     |     |     |     | 32  |
| TcL_XP_971752    | -----                  |                     |     |                                        |     |     |     |     | 21  |
| TmL15            | -----                  |                     |     |                                        |     |     |     |     | 26  |
| TmL6             | -----                  |                     |     |                                        |     |     |     |     | 26  |
| TcL_XP_971867    | -----                  |                     |     |                                        |     |     |     |     | 22  |
| TcL_XP_971975    | -----                  |                     |     |                                        |     |     |     |     | 26  |
| TcL_XP_969833    | -----                  |                     |     |                                        |     |     |     |     | 26  |
| TmL5             | -----                  |                     |     |                                        |     |     |     |     | 26  |
| TmL4             | -----                  |                     |     |                                        |     |     |     |     | 26  |
| TcL_XP_971698    | -----                  |                     |     |                                        |     |     |     |     | 26  |
| TmL9             | -----                  |                     |     |                                        |     |     |     |     | 21  |
| TmL8             | -----                  |                     |     |                                        |     |     |     |     | 19  |
| TmL7             | -----                  |                     |     |                                        |     |     |     |     | 19  |
| TmL11            | -----                  |                     |     |                                        |     |     |     |     | 114 |
| TcL_NP_001164088 | -----                  |                     |     |                                        |     |     |     |     | 114 |
| Papain           | -----                  |                     |     |                                        |     |     |     |     | 41  |
| TmF10            | -----                  |                     |     |                                        |     |     |     |     | 676 |
| TcF_XP_008195656 | KPVEVVSATTQVVAGTLYKITT | KISESDCSKNDNKDLDDCN | I   | LEGASPKTCELEVWEKLWENFRQFTIKCEGDEQSIKFQ |     |     |     |     | 691 |
| Tm012            | -----                  |                     |     |                                        |     |     |     |     | 34  |
| TcO_XP_970512    | -----                  |                     |     |                                        |     |     |     |     | 34  |
| TcK_XP_001814509 | -----                  |                     |     |                                        |     |     |     |     | 29  |









|                  | 1130                                                                            | 1140 | 1150 | 1160 | 1170 | 1180 | 1190 | 1200 |      |
|------------------|---------------------------------------------------------------------------------|------|------|------|------|------|------|------|------|
| TmL30            | -----                                                                           |      |      |      |      |      |      |      | 25   |
| TmL29            | -----                                                                           |      |      |      |      |      |      |      | 23   |
| TcL_XP_970773    | -----                                                                           |      |      |      |      |      |      |      | 11   |
| TmL13            | -----                                                                           |      |      |      |      |      |      |      | 25   |
| TcL_NP_001164001 | -----                                                                           |      |      |      |      |      |      |      | 25   |
| TcL_NP_001164314 | -----                                                                           |      |      |      |      |      |      |      | 25   |
| TmL1             | -----                                                                           |      |      |      |      |      |      |      | 25   |
| HsCathL2         | -----                                                                           |      |      |      |      |      |      |      | 28   |
| HsCathL1         | -----                                                                           |      |      |      |      |      |      |      | 28   |
| TmL3             | -----                                                                           |      |      |      |      |      |      |      | 26   |
| TmL2             | -----                                                                           |      |      |      |      |      |      |      | 26   |
| TcL_XP_970644    | -----                                                                           |      |      |      |      |      |      |      | 26   |
| TcL_XP_970951    | -----                                                                           |      |      |      |      |      |      |      | 32   |
| TcL_XP_971752    | -----                                                                           |      |      |      |      |      |      |      | 21   |
| TmL15            | -----                                                                           |      |      |      |      |      |      |      | 26   |
| TmL6             | -----                                                                           |      |      |      |      |      |      |      | 26   |
| TcL_XP_971867    | -----                                                                           |      |      |      |      |      |      |      | 22   |
| TcL_XP_971975    | -----                                                                           |      |      |      |      |      |      |      | 26   |
| TcL_XP_969833    | -----                                                                           |      |      |      |      |      |      |      | 26   |
| TmL5             | -----                                                                           |      |      |      |      |      |      |      | 26   |
| TmL4             | -----                                                                           |      |      |      |      |      |      |      | 26   |
| TcL_XP_971698    | -----                                                                           |      |      |      |      |      |      |      | 26   |
| TmL9             | -----                                                                           |      |      |      |      |      |      |      | 21   |
| TmL8             | -----                                                                           |      |      |      |      |      |      |      | 19   |
| TmL7             | -----                                                                           |      |      |      |      |      |      |      | 19   |
| TmL11            | -----QTILPDLTNFECTGEETISGILTEKWALTQTIGQKVNKYTMWLHYKDDPNNVGTKIAIPVRYEMNGYNLSLLGS |      |      |      |      |      |      |      | 186  |
| TcL_NP_001164088 | -----QSILPDLTGFECTGEETISGVLTEKWALSQTIGQKVNKYAMWLYYKDDPDNTGVKIAVPVKYEMRGFNLSLLGS |      |      |      |      |      |      |      | 186  |
| Papain           | -----                                                                           |      |      |      |      |      |      |      | 41   |
| TmF10            | -----AERG-----                                                                  |      |      |      |      |      |      |      | 708  |
| TcF_XP_008195656 | VSTERGQCGTLKDAKPKTCKFEVFEQLWVPNSRQIKTDCHKERRKRQTLPGGIKEVDKNNDKVFVHEGLLNLNTHLTT  |      |      |      |      |      |      |      | 1091 |
| Tm012            | -----                                                                           |      |      |      |      |      |      |      | 34   |
| Tc0_XP_970512    | -----                                                                           |      |      |      |      |      |      |      | 34   |
| TcK_XP_001814509 | -----                                                                           |      |      |      |      |      |      |      | 29   |

|                  | 1210                                                                             | 1220 | 1230 | 1240 | 1250 | 1260 | 1270 | 1280 |      |
|------------------|----------------------------------------------------------------------------------|------|------|------|------|------|------|------|------|
|                  | -----Q-WENFKL-----                                                               |      |      |      |      |      |      |      |      |
| TmL30            | -----K-WKNFKK-----                                                               |      |      |      |      |      |      |      | 32   |
| TmL29            | -----WXEFKL-----                                                                 |      |      |      |      |      |      |      | 29   |
| TcL_XP_970773    | -----QNWSQFKL-----                                                               |      |      |      |      |      |      |      | 19   |
| TmL13            | -----Q-WSQFKL-----                                                               |      |      |      |      |      |      |      | 32   |
| TcL_NP_001164001 | -----K-WAEFKL-----                                                               |      |      |      |      |      |      |      | 32   |
| TcL_NP_001164314 | -----K-WAEFKL-----                                                               |      |      |      |      |      |      |      | 32   |
| TmL1             | -----T-WVQFKL-----                                                               |      |      |      |      |      |      |      | 32   |
| HsCathL2         | -----K-WYQWKA-----                                                               |      |      |      |      |      |      |      | 35   |
| HsCathL1         | -----Q-WTKWKA-----                                                               |      |      |      |      |      |      |      | 35   |
| TmL3             | -----Q-WGAFKM-----                                                               |      |      |      |      |      |      |      | 33   |
| TmL2             | -----Q-WGAFKM-----                                                               |      |      |      |      |      |      |      | 33   |
| TcL_XP_970644    | -----Q-WGAFKV-----                                                               |      |      |      |      |      |      |      | 33   |
| TcL_XP_970951    | -----E-WMAFKL-----                                                               |      |      |      |      |      |      |      | 39   |
| TcL_XP_971752    | -----E-WENFKR-----                                                               |      |      |      |      |      |      |      | 28   |
| TmL15            | -----E-WSNFKN-----                                                               |      |      |      |      |      |      |      | 33   |
| TmL6             | -----Q-WTNFKN-----                                                               |      |      |      |      |      |      |      | 33   |
| TcL_XP_971867    | -----K-WENFKQ-----                                                               |      |      |      |      |      |      |      | 29   |
| TcL_XP_971975    | -----E-WNKFKA-----                                                               |      |      |      |      |      |      |      | 33   |
| TcL_XP_969833    | -----E-WNKFKA-----                                                               |      |      |      |      |      |      |      | 33   |
| TmL5             | -----K-WENFKT-----                                                               |      |      |      |      |      |      |      | 33   |
| TmL4             | -----K-WENFKT-----                                                               |      |      |      |      |      |      |      | 33   |
| TcL_XP_971698    | -----K-WESFKK-----                                                               |      |      |      |      |      |      |      | 33   |
| TmL9             | -----E-WEIFKA-----                                                               |      |      |      |      |      |      |      | 28   |
| TmL8             | -----D-WDSFKE-----                                                               |      |      |      |      |      |      |      | 26   |
| TmL7             | -----D-WNAFKE-----                                                               |      |      |      |      |      |      |      | 26   |
| TmL11            | HYDHYYLDYDSFSDPIPDDIFKLDSNMTCSAFPGPGDKHIYTFNPMAEFVHPAKTSHVDYE - FNKFTR-----      |      |      |      |      |      |      |      | 255  |
| TcL_NP_001164088 | HYDHYYLDYDSFSSDPIPDDIFKFDSNMKCSAFPGPGDKHIYTFNPMAEFIRPEKSGHVDFE - FGKFTR-----     |      |      |      |      |      |      |      | 255  |
| Papain           | -----TERLIQLFESWML-----                                                          |      |      |      |      |      |      |      | 54   |
| TmF10            | GQKHKSVEIVSASLQVVAGTLYRIKVKISPTDCSSNDRKKLDDCNVKGKASPKNCEIKVWEKPWENFKQFTITCDGDEKV |      |      |      |      |      |      |      | 787  |
| TcF_XP_008195656 | SNKVKPVEVVSASVQVVAGSLHRIKVKISESDCSRNDQKDFEQCNVLEGASPKLCEMEVWDKPEDFRRYTIKCEGENKK  |      |      |      |      |      |      |      | 1171 |
| Tm012            | -----Q-FLDYLE-----                                                               |      |      |      |      |      |      |      | 41   |
| Tc0_XP_970512    | -----Q-FQEYLK-----                                                               |      |      |      |      |      |      |      | 41   |
| TcK_XP_001814509 | -----Q-WEKFKQ-----                                                               |      |      |      |      |      |      |      | 36   |







|                  | 1450   | 1460    | 1470     | 1480     | 1490     | 1500   | 1510    | 1520   |          |          |       |     |      |
|------------------|--------|---------|----------|----------|----------|--------|---------|--------|----------|----------|-------|-----|------|
| TmL30            | -----  |         |          |          |          |        |         |        | 32       |          |       |     |      |
| TmL29            | -----  |         |          |          |          |        |         |        | 29       |          |       |     |      |
| TcL_XP_970773    | -----  |         |          |          |          |        |         |        | 19       |          |       |     |      |
| TmL13            | -----  |         |          |          |          |        |         |        | 32       |          |       |     |      |
| TcL_NP_001164001 | -----  |         |          |          |          |        |         |        | 32       |          |       |     |      |
| TcL_NP_001164314 | -----  |         |          |          |          |        |         |        | 32       |          |       |     |      |
| TmL1             | -----  |         |          |          |          |        |         |        | 32       |          |       |     |      |
| HsCathL2         | -----  |         |          |          |          |        |         |        | 35       |          |       |     |      |
| HsCathL1         | -----  |         |          |          |          |        |         |        | 35       |          |       |     |      |
| TmL3             | -----  |         |          |          |          |        |         |        | 33       |          |       |     |      |
| TmL2             | -----  |         |          |          |          |        |         |        | 33       |          |       |     |      |
| TcL_XP_970644    | -----  |         |          |          |          |        |         |        | 33       |          |       |     |      |
| TcL_XP_970951    | -----  |         |          |          |          |        |         |        | 39       |          |       |     |      |
| TcL_XP_971752    | -----  |         |          |          |          |        |         |        | 28       |          |       |     |      |
| TmL15            | -----  |         |          |          |          |        |         |        | 33       |          |       |     |      |
| TmL6             | -----  |         |          |          |          |        |         |        | 33       |          |       |     |      |
| TcL_XP_971867    | -----  |         |          |          |          |        |         |        | 29       |          |       |     |      |
| TcL_XP_971975    | -----  |         |          |          |          |        |         |        | 33       |          |       |     |      |
| TcL_XP_969833    | -----  |         |          |          |          |        |         |        | 33       |          |       |     |      |
| TmL5             | -----  |         |          |          |          |        |         |        | 33       |          |       |     |      |
| TmL4             | -----  |         |          |          |          |        |         |        | 33       |          |       |     |      |
| TcL_XP_971698    | -----  |         |          |          |          |        |         |        | 33       |          |       |     |      |
| TmL9             | -----  |         |          |          |          |        |         |        | 28       |          |       |     |      |
| TmL8             | -----  |         |          |          |          |        |         |        | 26       |          |       |     |      |
| TmL7             | -----  |         |          |          |          |        |         |        | 26       |          |       |     |      |
| TmL11            | -----  |         |          |          |          |        |         |        | 255      |          |       |     |      |
| TcL_NP_001164088 | -----  |         |          |          |          |        |         |        | 255      |          |       |     |      |
| Papain           | -----  |         |          |          |          |        |         |        | 54       |          |       |     |      |
| TmF10            | -----  |         |          |          |          |        |         |        | 922      |          |       |     |      |
| TcF_XP_008195656 | YVRESL | THLNTQL | TSSNKVKP | VEVLSATS | QVVAGTIH | RIKVKI | SESDCSK | DDEKDF | DECNIREG | ASPKICEV | KVWDK | PWQ | 1411 |
| Tm012            | -----  |         |          |          |          |        |         |        | 41       |          |       |     |      |
| TcO_XP_970512    | -----  |         |          |          |          |        |         |        | 41       |          |       |     |      |
| TcK_XP_001814509 | -----  |         |          |          |          |        |         |        | 36       |          |       |     |      |



HNEKYRQGLVITYTLGVNKFADMTPEEFLA-----YLNGLNXPK--PKPXEX---SPLFLPRAN---LPASVDWRDKGAVT

|                  | 1610  | 1620   | 1630   | 1640  | 1650  | 1660  | 1670  | 1680  |           |         |       |       |        |       |       |       |        |        |      |      |        |      |        |       |       |       |      |     |     |     |   |     |    |    |     |     |   |     |    |     |       |     |     |    |     |     |   |     |   |   |   |     |     |     |     |   |     |   |   |   |   |   |   |   |   |     |      |     |   |     |
|------------------|-------|--------|--------|-------|-------|-------|-------|-------|-----------|---------|-------|-------|--------|-------|-------|-------|--------|--------|------|------|--------|------|--------|-------|-------|-------|------|-----|-----|-----|---|-----|----|----|-----|-----|---|-----|----|-----|-------|-----|-----|----|-----|-----|---|-----|---|---|---|-----|-----|-----|-----|---|-----|---|---|---|---|---|---|---|---|-----|------|-----|---|-----|
| TmL30            | HNKLF | DKNEV  | SYKMA  | VNQFG | DL    | SQEE  | FLD   | ----- | YLKTY     | NNKGG   | AKTTK | SVKLQ | PHLNAE | ----- | VPDE  | IDWRE | NGAVT  | 127    |      |      |        |      |        |       |       |       |      |     |     |     |   |     |    |    |     |     |   |     |    |     |       |     |     |    |     |     |   |     |   |   |   |     |     |     |     |   |     |   |   |   |   |   |   |   |   |     |      |     |   |     |
| TmL29            | HNVRY | EKGEV  | TSKAM  | NKFGD | WTAE  | EEFLA | ----- | FVNST | RFQK      | --PRL   | TKA-- | PPKLH | LNRR   | ---   | AEDE  | VDWR  | SKGAVT | 124    |      |      |        |      |        |       |       |       |      |     |     |     |   |     |    |    |     |     |   |     |    |     |       |     |     |    |     |     |   |     |   |   |   |     |     |     |     |   |     |   |   |   |   |   |   |   |   |     |      |     |   |     |
| TcL_XP_970773    | HNTKY | RNGEV  | TYFKAM | NKFGD | LTDE  | FLA   | ----- | FVNRN | KLTK      | --REK   | NEK-- | HTKL  | NTTK   | IE--- | YETQ  | VDWR  | ANGLVS | 114    |      |      |        |      |        |       |       |       |      |     |     |     |   |     |    |    |     |     |   |     |    |     |       |     |     |    |     |     |   |     |   |   |   |     |     |     |     |   |     |   |   |   |   |   |   |   |   |     |      |     |   |     |
| TmL13            | HNAKF | EKGEV  | TSKAM  | NQFGD | MSKEE | FLA   | ----- | YVNRG | KAQK      | --PKH   | PEN-  | LRMPY | VSSK   | KP--- | LAAS  | VDWR  | SN-AVS | 127    |      |      |        |      |        |       |       |       |      |     |     |     |   |     |    |    |     |     |   |     |    |     |       |     |     |    |     |     |   |     |   |   |   |     |     |     |     |   |     |   |   |   |   |   |   |   |   |     |      |     |   |     |
| TcL_NP_001164001 | HNAKF | AKGEV  | TYTKAV | NQFAD | MTA   | DEFMA | ----- | YVNRG | LATK      | --PKM   | NEK-  | LRIPF | VKSG   | KP--- | AAAE  | VDWR  | SK-AVT | 127    |      |      |        |      |        |       |       |       |      |     |     |     |   |     |    |    |     |     |   |     |    |     |       |     |     |    |     |     |   |     |   |   |   |     |     |     |     |   |     |   |   |   |   |   |   |   |   |     |      |     |   |     |
| TcL_NP_001164314 | HNAKF | AKGEV  | TSKAVN | QFAD  | MTA   | DEFMA | ----- | YVNRG | LATK      | --PKK   | NEK-  | LRLPF | VQSD   | KP--- | AAAE  | VDWR  | NS-AVS | 127    |      |      |        |      |        |       |       |       |      |     |     |     |   |     |    |    |     |     |   |     |    |     |       |     |     |    |     |     |   |     |   |   |   |     |     |     |     |   |     |   |   |   |   |   |   |   |   |     |      |     |   |     |
| TmL1             | HNAKY | ARGEV  | TYTKAM | NRF   | GD    | MTKEE | FLA   | ----- | FVNRG     | KAQK    | --PKI | SEK-  | LRIPY  | VESK  | KP--- | RADS  | VDWR   | LD-AVS | 127  |      |        |      |        |       |       |       |      |     |     |     |   |     |    |    |     |     |   |     |    |     |       |     |     |    |     |     |   |     |   |   |   |     |     |     |     |   |     |   |   |   |   |   |   |   |   |     |      |     |   |     |
| HsCathL2         | HNGEY | SQK    | HGFT   | MAMNA | F     | GD    | MTNEE | FRQ   | ----      | MMG     | CFRN  | QK--  | FRK    | GKV-  | FRE   | PL    | FLD    | -----  | LPKS | VDWR | KKGYVT | 127  |        |       |       |       |      |     |     |     |   |     |    |    |     |     |   |     |    |     |       |     |     |    |     |     |   |     |   |   |   |     |     |     |     |   |     |   |   |   |   |   |   |   |   |     |      |     |   |     |
| HsCathL1         | HNQEY | REGK   | HSFT   | MAMNA | F     | GD    | MTSEE | FRQ   | ----      | VMN     | GFQNR | K--   | PRK    | GKV-  | FQE   | PL    | FYE    | -----  | APRS | VDWR | EKGYVT | 127  |        |       |       |       |      |     |     |     |   |     |    |    |     |     |   |     |    |     |       |     |     |    |     |     |   |     |   |   |   |     |     |     |     |   |     |   |   |   |   |   |   |   |   |     |      |     |   |     |
| TmL3             | HNKLY | AQGL   | V      | FKLG  | INKY  | AD    | MLH   | HEFVQ | ----      | VLN     | GFNR  | TKS   | GLR    | SGES  | -DDS  | VT    | FL     | PPAN   | VQ-  | LPG  | QID    | WR   | DKGAVT | 133   |       |       |      |     |     |     |   |     |    |    |     |     |   |     |    |     |       |     |     |    |     |     |   |     |   |   |   |     |     |     |     |   |     |   |   |   |   |   |   |   |   |     |      |     |   |     |
| TmL2             | HNKLY | AQGL   | V      | FKLG  | INKY  | AD    | MLH   | HEFVQ | ----      | VLN     | GFNR  | TKS   | GLR    | SGES  | -DDS  | VT    | FL     | PPAN   | VQ-  | LPG  | QID    | WR   | DKGAVT | 133   |       |       |      |     |     |     |   |     |    |    |     |     |   |     |    |     |       |     |     |    |     |     |   |     |   |   |   |     |     |     |     |   |     |   |   |   |   |   |   |   |   |     |      |     |   |     |
| TcL_XP_970644    | HNKLY | AQGL   | V      | FKL   | GVN   | KY    | SD    | MLN   | HEFVH     | ----    | TLN   | GYNR  | SKT    | PLR   | SGEL  | -DES  | IT     | FIP    | PAN  | VE-  | LPK    | QID  | WR     | KL    | GAVT  | 133   |      |     |     |     |   |     |    |    |     |     |   |     |    |     |       |     |     |    |     |     |   |     |   |   |   |     |     |     |     |   |     |   |   |   |   |   |   |   |   |     |      |     |   |     |
| TcL_XP_970951    | FNQEY | GRG    | QWS    | FVQ   | QLN   | NF    | AD    | MLH   | HEFHR     | ----    | TLN   | GFNR  | TL     | SAR   | V     | GIPQ  | ---    | SST    | FIP  | SAN  | VI-    | FPD  | Y      | VD    | WR    | EV    | GAVT | 137 |     |     |   |     |    |    |     |     |   |     |    |     |       |     |     |    |     |     |   |     |   |   |   |     |     |     |     |   |     |   |   |   |   |   |   |   |   |     |      |     |   |     |
| TcL_XP_971752    | HNERY | RKGL   | ETY    | YL    | RIND  | L     | SDY   | TDE   | EMSC      | -----   | CSE   | KAP   | KPS    | ITIL  | PNV   | ST    | SRQ    | ---    | LPK  | M    | VD     | WR   | L      | RG    | VVT   | 121   |      |     |     |     |   |     |    |    |     |     |   |     |    |     |       |     |     |    |     |     |   |     |   |   |   |     |     |     |     |   |     |   |   |   |   |   |   |   |   |     |      |     |   |     |
| TmL15            | HNERY | RQGL   | ETY    | EL    | GVN   | QF    | SDY   | TEE   | ELTP      | ----    | YTH   | GLL   | LP     | SE    | APE   | PLIS  | IDAN   | SSL    | VAR  | AR   | ---    | LPAS | F      | DW    | TR    | RG    | VVT  | 132 |     |     |   |     |    |    |     |     |   |     |    |     |       |     |     |    |     |     |   |     |   |   |   |     |     |     |     |   |     |   |   |   |   |   |   |   |   |     |      |     |   |     |
| TmL6             | HNERY | RQGL   | ETY    | EL    | GVN   | QF    | SDY   | TEE   | ELLP      | ----    | YTH   | GLR   | LP     | SE    | TP    | DPLIS | IDAN   | SSL    | VAR  | AT   | ---    | LPAS | L      | DW    | SR    | RG    | VVT  | 132 |     |     |   |     |    |    |     |     |   |     |    |     |       |     |     |    |     |     |   |     |   |   |   |     |     |     |     |   |     |   |   |   |   |   |   |   |   |     |      |     |   |     |
| TcL_XP_971867    | HNERY | RKGL   | ETY    | EM    | GINK  | F     | SDY   | TDE   | ELFS      | ----    | YTH   | GLQ   | LP     | SEL   | PEPI  | IK-   | ISP    | NAT    | LSL  | SRAG | -LP    | SS   | F      | DW    | SR    | RG    | VIT  | 129 |     |     |   |     |    |    |     |     |   |     |    |     |       |     |     |    |     |     |   |     |   |   |   |     |     |     |     |   |     |   |   |   |   |   |   |   |   |     |      |     |   |     |
| TcL_XP_971975    | HNERF | RNG    | SE     | TY    | EM    | GVN   | KFS   | D     | TDEELAN   | ----    | LTG   | L     | QV     | PP    | E     | FE    | QPLNE  | -TED   | PL   | LL   | SL     | GRG  | --     | IPAS  | L     | DW    | RQ   | RG  | VVT | 131 |   |     |    |    |     |     |   |     |    |     |       |     |     |    |     |     |   |     |   |   |   |     |     |     |     |   |     |   |   |   |   |   |   |   |   |     |      |     |   |     |
| TcL_XP_969833    | HNERF | RNG    | SE     | TY    | EM    | GVN   | KFS   | D     | TDEELSN   | ----    | LTG   | L     | QV     | P     | E     | FE    | QPLNE  | -TED   | PL   | LL   | PSL    | GRG  | --     | ISAS  | L     | DW    | RQ   | RG  | VVT | 131 |   |     |    |    |     |     |   |     |    |     |       |     |     |    |     |     |   |     |   |   |   |     |     |     |     |   |     |   |   |   |   |   |   |   |   |     |      |     |   |     |
| TmL5             | HNEKY | RQGL   | V      | SYTL  | GVN   | L     | F     | DM    | TPEEMKA   | ----    | YTH   | GL    | I      | M     | PADL  | H     | KNGIP  | -IK    | TRED | L    | GL     | N    | AS     | V     | R     | PAS   | F    | D   | WR  | DQ  | G | M   | V  | S  | 134 |     |   |     |    |     |       |     |     |    |     |     |   |     |   |   |   |     |     |     |     |   |     |   |   |   |   |   |   |   |   |     |      |     |   |     |
| TmL4             | HNEK  | FRQGL  | V      | TYTL  | G     | INK   | F     | AD    | MTEEEIKP  | ----    | YTH   | GL    | V      | Q     | P     | A     | Q      | L      | P    | K    | P      | L    | F      | E-    | I     | K     | S    | RED | L   | G   | L | DA  | V  | GE | H   | PAS | F | D   | WR | DQ  | G     | M   | V   | T  | 134 |     |   |     |   |   |   |     |     |     |     |   |     |   |   |   |   |   |   |   |   |     |      |     |   |     |
| TcL_XP_971698    | HNERF | NKGL   | ETY    | TM    | G     | IN    | M     | F     | DM        | TPEEMRP | ----  | YTH   | GL     | I     | E     | P     | A      | V      | P    | K    | P      | L    | V      | E-    | I     | K     | S    | R   | AD  | L   | G | L   | N  | H  | S   | V   | Q | PAS | F  | D   | WR    | D   | K   | G  | M   | V   | T | 134 |   |   |   |     |     |     |     |   |     |   |   |   |   |   |   |   |   |     |      |     |   |     |
| TmL9             | HNRKY | DQGL   | V      | SYSL  | Q     | I     | N     | H     | FADHTVEDL | TR      | ----- | GSR   | P      | ST    | K     | P     | H      | K      | K    | P    | S      | ---- | KAT    | P     | RAE   | ---   | VP   | D   | S   | I   | D | W   | R  | D  | Y   | G   | V | I   | T  | 118 |       |     |     |    |     |     |   |     |   |   |   |     |     |     |     |   |     |   |   |   |   |   |   |   |   |     |      |     |   |     |
| TmL8             | HNEKY | AQGL   | STY    | SV    | GVN   | N     | L     | ADL   | THEEIVF   | ----    | WSQ   | G     | S      | S     | R     | N     | L      | S      | V    | G    | S      | S    | P      | I     | ----  | PK    | F    | I   | P   | R   | D | --- | VP | E  | S   | I   | D | W   | R  | D   | Y     | G   | V   | V  | T   | 121 |   |     |   |   |   |     |     |     |     |   |     |   |   |   |   |   |   |   |   |     |      |     |   |     |
| TmL7             | HNK   | KYTQGL | STY    | T     | I     | GVN   | K     | FADL  | THEEIVS   | ----    | SSK   | S     | T      | R     | E     | V     | T      | T      | V    | R    | S      | S    | P      | ---   | TP    | K     | F    | I   | P   | R   | D | --- | VP | E  | S   | I   | D | W   | R  | D   | Y     | G   | V   | V  | T   | 122 |   |     |   |   |   |     |     |     |     |   |     |   |   |   |   |   |   |   |   |     |      |     |   |     |
| TmL11            | VNRQ  | NK     | ----   | G     | F     | T     | L     | T     | VNHL      | AD      | K     | N     | P      | A     | E     | L     | K      | A      | L    | R    | G      | R    | T      | Y     | S     | G     | G    | Y   | N   | G   | G | A   | P  | F  | P   | Y   | K | N   | I  | Q   | ----- | KEA | --- | LP | D   | Q   | W | D   | W | R | L | Y   | G   | A   | V   | T | 346 |   |   |   |   |   |   |   |   |     |      |     |   |     |
| TcL_NP_001164088 | MNRQ  | NR     | ----   | G     | F     | T     | L     | T     | VNHL      | AD      | K     | T     | P      | T     | E     | L     | K      | A      | L    | R    | G      | R    | T      | Y     | S     | G     | G    | Y   | N   | G   | G | A   | P  | F  | P   | Y   | E | N   | I  | N   | ----- | KED | --- | LP | D   | Q   | W | D   | W | R | L | L   | G   | A   | V   | T | 346 |   |   |   |   |   |   |   |   |     |      |     |   |     |
| Papain           | TN    | K      | K      | N     | ----  | S     | Y     | W     | L         | G       | L     | N     | V      | F     | A     | D     | M      | S      | N    | D    | E      | F    | K      | ----- | K     | Y     | T    | G   | S   | I   | A | G   | N  | Y  | T   | T   | E | L   | S  | Y   | --    | E   | E   | V  | L   | N   | D | G   | D | V | N | --- | I   | P   | E   | Y | D   | W | R | Q | K | G | A | V | T | 147 |      |     |   |     |
| TmF10            | LNA   | -      | Y      | E     | Q     | G     | T     | A     | V         | --      | G     | V     | T      | K     | F     | A     | D      | L      | T    | Q    | N      | E    | F      | S     | K     | ----- | S    | L   | G   | L   | R | T   | D  | L  | R   | N   | E | N   | E  | P   | -     | P   | F   | A  | D   | A   | E | I   | P | D | V | Q   | --- | L   | P   | T | E   | F | D | W | R | K | K | G | V | T   | 1033 |     |   |     |
| TcF_XP_008195656 | LNT   | -      | F      | E     | Q     | G     | T     | A     | T         | --      | G     | I     | T      | R     | F     | A     | D      | M      | T    | Q    | K      | E    | F      | S     | R     | ----- | S    | L   | G   | L   | R | T   | D  | L  | R   | N   | E | N   | E  | T   | -     | P   | F   | A  | Q   | A   | K | I   | P | N | I | E   | --- | L   | P   | K | E   | F | D | W | R | K | K | N | V | T   | 1555 |     |   |     |
| Tm012            | LNS   | N      | K      | T     | G     | D     | S     | A     | V         | --      | G     | L     | T      | K     | F     | S     | D      | L      | P    | E    | E      | F    | L      | N     | ----- | K     | H    | L   | H   | L   | N | L   | C  | Q  | R   | F   | I | P   | H  | S   | N     | T   | -   | H  | H   | H   | H | H   | D | K | R | S   | T   | --- | L   | P | Q   | K | I | D | W | R | E | K | K | V   | T    | 136 |   |     |
| TcO_XP_970512    | LNS   | K      | K      | R     | N     | G     | S     | A     | L         | --      | G     | L     | T      | K     | F     | S     | D      | L      | P    | E    | E      | F    | F      | Q     | ----- | T     | Y    | L   | Q   | S   | N | L   | S  | Q  | K   | T   | H | S   | N  | -   | E     | P   | K   | R  | H   | H   | H | K   | R | A | T | --- | V   | P   | N   | K | V   | D | W | R | E | K | N | A | V | T   | 134  |     |   |     |
| TcK_XP_001814509 | HNE   | E      | A      | D     | K     | G     | L     | H     | S         | Y       | I     | K     | E      | N     | D     | L     | S      | D      | M    | S    | T      | Q    | S      | Y     | L     | Q     | ---- | K   | M   | V   | K | L   | T  | K  | S   | T   | H | R   | K  | V   | D     | P   | E   | V  | --- | V   | G | D   | L | F | E | L   | L   | H   | --- | I | P   | E | E | V | N | W | V | E | K | G   | F    | E   | T | 132 |


  
 PVKNQGCWAFSTTGALEGOYXIKTG-KL--VSLSEQNLVDCSXNYG--GCNGGW----MDNAYQYIA-DNGGIDTE

|                  | 1690  | 1700   | 1710  | 1720    | 1730      | 1740    | 1750    | 1760    |                                          |                                        |             |            |        |
|------------------|-------|--------|-------|---------|-----------|---------|---------|---------|------------------------------------------|----------------------------------------|-------------|------------|--------|
| TmL30            | DVEDQ | GALGS  | AWAF  | SVTGALE | QNFLEK    | EGS     | -----   | IVEG    | YNYVI-EY-GLSAA 190                       |                                        |             |            |        |
| TmL29            | EVGTE | GDCGAS | WSFS  | SALGALE | QLAIKTG   | QL--    | VALSSQ  | NLLDCS  | ADYGNACGGGL----THSAYDYIQ-DN-GIMSE 195    |                                        |             |            |        |
| TcL_XP_970773    | DVKNE | QDCSS  | WSFS  | SALGAVE | QLALKTN   | QL--    | TLSAQ   | NLIDCS  | ADF---GCNGGH----ATNAYSYSIS-QF-GIMPE 182  |                                        |             |            |        |
| TmL13            | EVKDQ | GQCGS  | CWSF  | STTGAVE | QLALQRG   | RL--    | TSLSEQ  | NLIDCS  | SSYGNAGCDGGW----MDSAFSYIH-DY-GIMSE 198   |                                        |             |            |        |
| TcL_NP_001164001 | EVKDQ | GQCGS  | CWSF  | STTGAVE | QLAISGK   | GL--    | TSLSEQ  | NLIDCS  | SQYGNAGCNGGW----MDSAFDYIH-DN-GIMSE 198   |                                        |             |            |        |
| TcL_NP_001164314 | EVKDQ | GQCGS  | CWSF  | STTGAVE | QLAISGR   | GL--    | TSLSEQ  | NLIDCS  | SAYGNAGCNGGW----MDSAFDYIH-DN-GIMSE 198   |                                        |             |            |        |
| TmL1             | DIKDQ | GDCGS  | CWSF  | SATGALE | QLAIQKD   | LM--    | VSLSEQ  | NLIDCS  | RDYGNAGCNGGY----MDSAFDYIH-DN-GIMKE 198   |                                        |             |            |        |
| HsCathL2         | PVKNQ | KQCGS  | CWAF  | SATGALE | QMFRTG    | KL--    | VSLSEQ  | NLIDCS  | RPQGNQCGNGGF----MARAFQYVK-ENGLDSE 199    |                                        |             |            |        |
| HsCathL1         | PVKNQ | GQCGS  | CWAF  | SATGALE | QMFRTG    | RL--    | ISLSEQ  | NLIDCS  | GPQGNQCGNGGL----MDYAFQYVQ-DNGLDSE 199    |                                        |             |            |        |
| TmL3             | PVKDQ | GQCGS  | CWSF  | SATGSLE | QHFRTG    | KL--    | VSLSEQ  | NLIDCS  | SEKFGNNGCNGGL----MDNAFRYIK-ANGGIDTE 205  |                                        |             |            |        |
| TmL2             | PVKDQ | GQCGS  | CWSF  | SATGSLE | QHFRTG    | KL--    | VSLSEQ  | NLIDCS  | SEKFGNNGCNGGL----MDNAFRYIK-ANGGIDTE 205  |                                        |             |            |        |
| TcL_XP_970644    | PVKDQ | GQCGS  | CWSF  | STTGSLE | QHFRTG    | KL--    | VSLSEQ  | NLIDCS  | SEKFGNNGCNGGL----MDNAFRYIK-DNGLDTE 205   |                                        |             |            |        |
| TcL_XP_970951    | PVKNQ | GSCAG  | CWAF  | SAAGALE | GHNFRKTG  | RL--    | VELSPQ  | NLIDCS  | TNYGNDGCSGGL----MNPAYEYVR-TNPGIDTE 209   |                                        |             |            |        |
| TcL_XP_971752    | PVKHQ | GKCGT  | CWAF  | AIIGATE | AQYRIHRG  | SF--    | VILSEQ  | QLVDC   | VREVS--SCRGVY----LHETYKYIV-KSEGINYD 191  |                                        |             |            |        |
| TmL15            | PVKNQ | ASC    | CGS   | CWAF    | STVGALE   | AHYRIRY | RT--    | VTLSEQ  | QLVDC                                    | VPH---GCRGGW----MPNAYLYIA-RNGGINYD 200 |             |            |        |
| TmL6             | PVKNQ | ASC    | CGS   | CWAF    | STTGALE   | SHYKIRY | ST--    | VTLSEQ  | QLVDC                                    | PEAH--GCSGGW----MADAYMYIA-RNGGINYD 202 |             |            |        |
| TcL_XP_971867    | PVKNQ | RNCGS  | CWAF  | STNGALE | AHYKIRRG  | SV--    | VTLSEQ  | QLVDC   | VRFQAF--GCRGGW----MTDAYMYIA-RNGGINLD 199 |                                        |             |            |        |
| TcL_XP_971975    | PVKNQ | GQCGS  | CWAF  | ATIGAIE | SHYKIRHK  | RA--    | ISLSEQ  | QLVDC   | VGRGG--GCCGGW----MPTAYSIA-RNKGVNYN 201   |                                        |             |            |        |
| TcL_XP_969833    | PVKNQ | GQCGS  | CWAF  | ATIGAIE | SHYKIRHK  | RA--    | ISLSEQ  | QLVDC   | VGRGG--GCCGGW----IPTAYSIA-RNKGVNYN 201   |                                        |             |            |        |
| TmL5             | PVKNQ | GSCGS  | CWAF  | SSTGAIE | SQMKIANG  | AGYDSS  | VSEQL   | VDC     | VPNAL--GCSGGW----MNDAFYVA-QNGGIDSE 206   |                                        |             |            |        |
| TmL4             | PVKDQ | GDCGS  | CWAF  | SSTGAIE | SQMKIAQ   | ASLDIS  | LSEQ    | QLVDC   | V-NEG--SCDGGW----MTDAFTYIA-DNGLDSE 205   |                                        |             |            |        |
| TcL_XP_971698    | GVKNQ | GGCGS  | CWAF  | SSTGAIE | SQVKIAK   | ANTDIS  | VSEQL   | VDC     | DTAAD--GCCGGW----MTDAFTYIA-QTGGIDSE 206  |                                        |             |            |        |
| TmL9             | PIVDQ | DI     | ICLTC | WAF     | AVVAAL    | EGHVG   | IHLGVKN | --ETL   | SEENLVDC                                 | VYSDF--ECKE                            | EMERSALEDCY | EYIL-DNGLD | TA 193 |
| TmL8             | PIANQ | ERCMS  | CWAF  | AIVATV  | ESHVAIY   | EG-RN-- | VLSVQN  | LVDC    | VDPTF--DCMQ                              | LDPKALDNTY                             | QYII-DNDG   | IDL 195    |        |
| TmL7             | PISNQ | ELCMS  | CWAF  | AVVATL  | EAHVGIY   | EG-RN-- | VLSQ    | QNLVDC  | VDPTF--TCSQ                              | YLDIHALDNTY                            | QYIV-DNGL   | DLR 196    |        |
| TmL11            | PVKDQ | SVCGS  | CWSF  | GTGTV   | EGALFL    | KNGNL   | --IRLSQ | QALIDCS | SWGYNNGCDG                               | GE----DFRAYQ                           | WML-KHGG    | IPT 419    |        |
| TcL_NP_001164088 | PVKDQ | SVCGS  | CWSF  | GTGTV   | EGALFL    | HNGRL   | --FRLSQ | QALVDC  | SWGYNNGCDG                               | GE----DFRAYQ                           | WML-KHGG    | IPT 419    |        |
| Papain           | PVKNQ | GSCGS  | CWAF  | SAVVTIE | GIIKIRTG  | NL--    | NEYSEQ  | ELLDC   | RRSY--GCNGGY----PWSALQLVA-QY-GIHYR 216   |                                        |             |            |        |
| TmF10            | EVKNQ | EQCGS  | CWAF  | SVTGNV  | EGQYAIKHG | KL--    | AEFSEQ  | ELVDC   | DTEDQ--GCNGGL----MDTAYRMIE-KLGGLETE 1103 |                                        |             |            |        |
| TcF_XP_008195656 | EVKNQ | EQCGS  | CWAF  | SVTGNV  | EGQYALRHG | KL--    | LEFSEQ  | ELVDC   | DTDDQ--GCNGGL----MDTAYRSIE-KIGGLETE 1625 |                                        |             |            |        |
| Tm012            | KVHNQ | GNCGAC | WAY   | SVVETIE | SMYGIKTQ  | TT--    | EDLSVQ  | EIIDC   | AGNNND--GCNGGD----VCSLLSWMKMTNFTIHK 208  |                                        |             |            |        |
| TcO_XP_970512    | RIYNQ | GSCGAC | WAY   | SVIETV  | ESMNAIKTN | KS--    | EELSVQ  | EIIDC   | AGNNK--GCNGGD----ICTLLSWIKATNFTIQRH 205  |                                        |             |            |        |
| TcK_XP_001814509 | PSYDQ | KDCGS  | CWAF  | SIASVL  | QAQIFKQTE | KL--    | VPLSEQ  | QIVDC   | SVSMGNYGCGGS----LRNTLRYLE-KAGGLMTY 204   |                                        |             |            |        |

SDY-PYEAXD-GSCRFDXSKS-XATITGYVDI-TSGDEEALKDAVATVGPVSVVAIDAXGE-FQFYSGGVY--YXPTCS--  
1770 1780 1790 1800 1810 1820 1830 1840

|                  |                                                                                     |      |
|------------------|-------------------------------------------------------------------------------------|------|
| TmL30            | ADY-PSDSSD-GTCRRGDIPA-AVTESGYVVI--MGNEEALKDTIAAAGPISVAVDATN--WQFYTGGVF--LDANCS--    | 260  |
| TmL29            | SDY-PYEGQQ-GSCRFDSSKS-VTKISGYQDV-DYMSETSLQTTVATIGPVASAVHATDN-LQFYGGIF--FDTCNLS      | 268  |
| TcL_XP_970773    | KDY-PYEGKA-GVCRFDASKS-ITVTGTFYDI-DPNDETALQGALAMGPIAATIEATEE-LQFYKGGIL--LDEKCSNK     | 255  |
| TmL13            | SAY-PYEAQD-DYCRFDSSQS-VTTL SGYYDL-PSGDENSLADAVGQAGPVAVAI DATDE-LQFYSGGLF--YDQTCN--  | 270  |
| TcL_NP_001164001 | SAY-PYTAMD-GNCRFDASQS-VTSLQGYVDI-PSGDESALQDAVANNGPVAVAI DATEE-LQLYSGGLV--YDTCN--    | 270  |
| TcL_NP_001164314 | SAY-PYTASE-GSCRFNPSES-VTSLQGYVDI-PSGDENALKSAVANNGPVAVAI DATDE-LQFYSGGLV--YDTCN--    | 270  |
| TmL1             | DAY-PYEGVD-RDCRYDPSRS-VTSLTGYYDL-PSGSESALEDAVSNVGPVAVAI DATAE-LQFYGGIF--YDETCN--    | 270  |
| HsCathL2         | ESY-PYVAVD-EICKYRPENS-VANDTGFTVV-APGKEKALMKAVATVGPVSVAMDAGHSSFFQFYKSGIY--FEPDCS--   | 272  |
| HsCathL1         | ESY-PYEATE-ESCKYNPKYS-VANDTGFDVI--PKQEKALMKAVATVGPVSVAMDAGHESFLFYKEGIY--FEPDCS--    | 271  |
| TmL3             | QAY-PYKAED-EKCHYKPKNK-GATDRGYVDI-ESGNEDKLQSAVATVGPVSVAI DASHQSFQLYSGGVY--YEPDCS--   | 278  |
| TmL2             | QAY-PYKAED-EKCHYKPKNK-GATDRGYVDI-ESGNEDKLQSAVATVGPVSVAI DASHQSFQLYSGGVY--YEPECS--   | 278  |
| TcL_XP_970644    | QSY-PYKAED-EKCHYKPRNK-GATDRGFVDI-ESGDEEKLKAAVATVGPVSVAI DASHPTFQYQYSEGVY--YEPECS--  | 278  |
| TcL_XP_970951    | DSY-PYEARN-GPCRFRPETV-GAYCTGYVDI-AEGDEQGLEAAIATLGPVSAAMDAGRQSFQFYSDGIY--YDPOCGNR    | 283  |
| TcL_XP_971752    | QDY-RYQSAP-GTCRFRADKP-KITFRKYAYL-TAISEEDLQWIVANVGPVTVSFDGRGKQFKYSYSGGVF--YNKTC---   | 263  |
| TmL15            | RDY-RYEARD-NACRYRSSMP-RVSVRGYAYL-TGPNEEMLKDMVVTQGPVSVAFDSSGN-FAGYRGGVY--YNPRCS--    | 272  |
| TmL6             | RDY-PYEARD-NSCRYSSSRA-RVSVRGYAYL-TGPNEEMLKDMVATQGPVSVAFDAGGN-FAGYSGGVY--YNPSCS--    | 274  |
| TcL_XP_971867    | RNY-PYKASA-GPCRFQASKP-KVTIRGYAYL-TGPNEEMLKHMVVTQGPVSVAI DASGR-FASYGGGVY--YNPSCA--   | 271  |
| TcL_XP_971975    | RDY-RYQGRN-GRCRYRSSKP-HIAIRSYAAINNNNNEERVRLVATKGPVSVAIHVDSRTFNRYKSGVY--NNPSC---     | 274  |
| TcL_XP_969833    | RDY-PYLGRN-GKCRYRSSKP-HIAIRSYAAINNNNNEERVRLVATKGPVSVAIHVDSRTFHKYKSGVY--NNPSC---     | 274  |
| TmL5             | GAY-PYEMAD-GNCHYDPNQV-AARLSGYVYL-SGPDENMLADMVATKGPVAVAFDADDP-FGSYSGGVY--YNPTCE--    | 278  |
| TmL4             | EAY-PYEMKN-GHCHYDVNTV-AARITKYDYL-SVPDEDLADMVATKGPVAVAFDAEGD-FGYSGGVY--YDSYCV--      | 277  |
| TcL_XP_971698    | SSY-PYKVD-ESCHFMSDKV-AAKLGAYL-TGPDENMLADMVSSKGPVSVAFDAEGD-FGSYSGGVY--YNPNCA--       | 278  |
| TmL9             | TSY-PYDKEM-EECRFKENV-GAQIKDYVTI-AEGDEEEMKTVVGTIGPVSVIITVDFT-FMVYQKGVY--YKEDCVNT     | 266  |
| TmL8             | ESY-PNEYQTVGSCRFKRENV-GATIKAYANI-TEGDEEELKAVVGTIGPVTVITTTDFA-WDFYHKGVY--YNDDCMNT    | 269  |
| TmL7             | DSY-PVEYTVGSCRFKSETV-GATIKAYGNI-TEGDEEELKAVVGTIGPVTVITTTDFS-WDLYREGVY--YNGDCMNT     | 270  |
| TmL11            | ADYGSYLQGD-GYCHADKVPK-VAKITGYINV-TANDESALRMALFKQGPISVGI DASQRTFSFYNSGVY--YEPKCGNK   | 494  |
| TcL_NP_001164088 | EAYGYPYLQGD-GYCHADKVQK-VAKITGYVNV-TTNDENALRLALFKHGPIVSVAI DASQRTFSFYNSGVY--YEPKCGNK | 494  |
| Papain           | NTY-PYEGVQ-RYCRSREKGPYAAKTDGVRQV-QPYNEGALLYSIANQ-PVSVLEAAGKDFQLYRGGIF--VGP-CG--     | 288  |
| TmF10            | QDY-PYDAED-ETCHFNSLA-RVQLTGAMNI-SHNETDMAKWL VAN-GPISIAINANA--MQFYMGVSHPYKFLCN--     | 1175 |
| TcF_XP_008195656 | QDY-PYDAED-EKCHFNRSLA-RVQVTGALNI-SHNETDMAKWL VAN-GPISIAINANA--MQFYMGVSHPFKFLCS--    | 1697 |
| Tm012            | SDY----GKN-SHCGKVSAA--GVQVQDFVCDRLVGSSENVMMKLLVGIGPLAVAVNAQT--WQNYIGGVI---EYHCDGD   | 276  |
| TcO_XP_970512    | ADY-----G-GKCGRGSAAA--GVHVRDFMCEGLVGSSENVMLRLLADNGPLAVAVNAQT--WQNYIGGVI---EYHCDGD   | 270  |
| TcK_XP_001814509 | SDY-PYLARQ-QRCRFDKHRA-IVNLTWAVL-PARDERALELAVAKIGPVAASINASPHTFQLYHSGVY--DDVACS--     | 277  |

TNXLNHAVLXVGYG---X--ENGQDYWLVKNSWGTEWGEQGYIKMARNRNNN---CGIATAASYPVV-

|                  | 1850                 | 1860                | 1870                     | 1880      | 1890          | 1900   |         |      |
|------------------|----------------------|---------------------|--------------------------|-----------|---------------|--------|---------|------|
| TmL30            | STELNHGVLAVGYG       | ---V--DDGTDYWIVKNS  | SWGTEWGEDGYIRTARNADNN    | ---       | CGIATDPTCPIL  |        | 318     |      |
| TmL29            | LTDLNHGVLIVGYG       | ---T--ELQDYWIVKNS   | SWGTDWGENGFYKSIRNYGNN    | ---       | CGIATSCSYPLV  |        | 327     |      |
| TcL_XP_970773    | VPDLNHGVLVVGYG       | ---S--ENGGDFWIVKNS  | SWGSDWEGGYRVPVRNHGNN     | ---       | CGIASSATLPIL  |        | 314     |      |
| TmL13            | QSDLNHGVLVVGYG       | ---S--DNGQDYWILKNS  | SWGSGWGENGYWTQVRNYGNN    | ---       | CGIATAASYPAL  |        | 328     |      |
| TcL_NP_001164001 | AQALNHGVLVVGYG       | ---S--EGGQDYWIVKNS  | SWGSGWGEQGYWRQARNRNNN    | ---       | CGIATAASYPAL  |        | 328     |      |
| TcL_NP_001164314 | AQALNHGVLVVGYG       | ---S--EGGQDYWIVKNS  | SWGSGWGEQGYWRQARNRNNN    | ---       | CGIATAASYPAL  |        | 328     |      |
| TmL1             | ETDLNHGVLVVGVD       | ---S--ESGQDYWIVKNS  | SWGIRWGEQGYWRQARNRGNN    | ---       | CGIASQASYPTL  |        | 328     |      |
| HsCathL2         | SKNLDHGVLVVGYG       | FEGAN--SNNSKYWLVKNS | SWGPEWGSNGYVVKIAKDKNNH   | ---       | CGIATAASYPNV  |        | 334     |      |
| HsCathL1         | SEDMDHGVLVVGYG       | FESTE--SDNNKYWLVKNS | SWGEEWGMGGYVKMAKDRRNH    | ---       | CGIASAASYPTV  |        | 333     |      |
| TmL3             | ASQLDHGVLVVGYG       | ---TE--DDGTDYWLVKNS | WGKSWGDDQGYIKMARNRDNN    | ---       | CGIATEASYPLV  |        | 337     |      |
| TmL2             | PSQLDHGVLVVGYG       | ---TE--DDGTDYWLVKNS | WGKSWGDDQGYIKMARNRDNN    | ---       | CGIATEASYPLV  |        | 337     |      |
| TcL_XP_970644    | SEQLDHGVLVVGYG       | ---TD--EDGNDYWLVKNS | WGDSWGDDQGYIKMARNRDNN    | ---       | CGIATQASYPLV  |        | 337     |      |
| TcL_XP_970951    | PDDVNHAVLVVGYG       | ---TE--PNGQKYWLVKNS | YGPQWGIGGYVVKLAKDANNH    | ---       | CGIATQASYPLV  |        | 343     |      |
| TcL_XP_971752    | TRMKTHAVLVVGYG       | ---T--ENGEDEFWLVKNS | YGPQWGLDGYVVKIARNRNNH    | ---       | CGITNRITYPIFD |        | 322     |      |
| TmL15            | TNKFTHAVVIVGYG       | ---R--ENGQDYWLVKNS  | WGSNWGGQGYVKMARNRGNN     | ---       | CGIASQASY     |        | 327     |      |
| TmL6             | TNQFTHAVVIVGYG       | ---T--ENGQDYWLVKNS  | WGSNWGGQGYIKMARNRGNN     | ---       | CGIASKASYPVF  |        | 332     |      |
| TcL_XP_971867    | RNKFTHAVVIVGYG       | ---R--ENGQDYWLVKNS  | WGRDWLGGYIKMARNRNNH      | ---       | CGIASKASYPVF  |        | 329     |      |
| TcL_XP_971975    | RGGLNHAVLVVGYG       | ---R--ERGVYWLVKNS   | WAGWGQKGYVKMARNRRNQ      | ---       | CGIATHASYPVF  |        | 332     |      |
| TcL_XP_969833    | RGGLNHAVVIVGYG       | ---R--ERGVYWLVKNS   | WAGWGQKGYVKMARNRRNQ      | ---       | CGIATHASYPVF  |        | 332     |      |
| TmL5             | TNKFTHAVLVVGYG       | ---N--ENGQDYWLVKNS  | WDGWGLDGYFKIARNANNH      | ---       | CGIAGVASVPTL  |        | 336     |      |
| TmL4             | TDSFTHAVLVVGYG       | ---N--ENGQDYWLVKNS  | WPEWGLEGYFKIARNANNH      | ---       | CGIASKASIPVL  |        | 335     |      |
| TcL_XP_971698    | TNKFTHAVLVVGYG       | ---N--ENGQDYWLVKNS  | WDGWGEHGYFKIARNKGNH      | ---       | CGIASKASYPVA  |        | 337     |      |
| TmL9             | KEPYNHAVTVVGYG       | ---T--EDGQDYWLVKNS  | EWGLTFGDQGYIKMARNRENN    | ---       | CGIATYATYPIV  |        | 325     |      |
| TmL8             | DEIFNHAAVVVGYG       | ---N--EDGEDYWLVKNS  | WGTYFGDQGYIKMARNRDNN     | ---       | CGIASRARYPFM  |        | 328     |      |
| TmL7             | DEIFNHAVVIVGYG       | ---S--EDGEDYWLVKNS  | WGTYFGDQGYIKMARNRDNN     | ---       | CGIASIARYPLI  |        | 329     |      |
| TmL11            | VDELDAHAVLAVGYG      | ---T--INGENYWLKNS   | WSNYWGDGYILMS-SKENN      | ---       | CGVMTTPTYVTM  |        | 552     |      |
| TcL_NP_001164088 | IDELDAHAVLAVGYG      | ---T--INGENYWLKNS   | WSNYWGDGYILMS-SKDNN      | ---       | CGVMTTPTYVTM  |        | 552     |      |
| Papain           | -NKVDHAAVAVGYG       | -----PNYILIKNS      | SWGTEWGENGYIRIKRGTGNSYGV | CGLYTSSFY | PVKN          |        | 345     |      |
| TmF10            | PKNLDHGVLIVGYGVHNYPL | FKKTL               | PYWIVKNSWGTSWGEQGYR      | VYRGDGT   | ---           | CGLNQT | PSSAIVA | 1239 |
| TcF_XP_008195656 | PKNLDHGVLIVGYGVHNYPL | FKKSL               | PYWIVKNSWGTEWGEQGYR      | VYRGDGT   | ---           | CGLNQT | PSSAIVA | 1761 |
| Tm012            | VSSLNHAVQIVGYD       | ---L--TAQIPHYIVRNT  | WGEDWGDGGYLYIAVDKNN      | ---       | CGVANEYS      | SAVTVL | 335     |      |
| TcO_XP_970512    | PSKLNHAVQIVGYD       | ---L--TASIPHYIVRNT  | WGVDFDGGFLYIAVDKNN       | ---       | CGIANEYS      | SALRVL | 329     |      |
| TcK_XP_001814509 | SNHVNHAVLIVGYT       | -----KNAWILKNS      | WGWKHWGEKGYMRLRRGKNR     | ---       | CGIANYAAYALV  |        | 330     |      |
