# Supplementary material for: Functional analysis of C1 family cysteine peptidases in the larval gut of Тenebrio molitor and Tribolium castaneum
Source: PubMed Central journal article supplement (PMC4336737; doi:10.1186/s12864-015-1306-x), 2015-02-14
Supplement: 12864_2015_1306_MOESM3_ESM.pdf [file 12864_2015_1306_MOESM3_ESM.pdf]

-----MKXXLLVVXLLLTL-----SLSWAKTEI--LSDE-----

10 20 30 40 50 60 70 80

TmB27 -----MKIGLLVVAISTL-----PYCWSKTEI--LSDK----- 28

TmB26 -MQKMKITILVVAISTL-----SYCWAKTEI--LSNK----- 32

TmB25 -----MKITILVVAISTL-----SYCWAKTEI--LSNK----- 28

TmB24 -----ILVVAVSTL-----SYCWAKTEI--LSDE----- 24

TcB\_XP\_966750 -----MRSYL VVVFVLTFS-----SALSAQNPI--LSDE----- 28

TcB\_XP\_966663 -----MKSLVLLLALFL-----PKSSPKTPI--LSQQ----- 26

\*TmB32 -MALTNWTRGLVAITIIAVGSA LMDDYFDLPGPYCQRGCGCPGRQDDCSVPILGTL CYCDDFCNRTRNEDCCPDFWSHCR 79

\*TcB\_XP\_008195382 -MASFSWLCPVALTLLTLTTA QFSDYSDLRGPYCQRGCGCPGRQDDCSEPI LGTL CYCDDFCNRTRNEDCCPDFWTHCK 79

Papain MAMIPSISKLLFVAICLFVYM-----GLSFGDFSIVGYSQN----- 37

TmB28 -----MRHAFLLYALTIF-----SLCEVK-KCQYLTKT----- 28

TcB\_XP\_008196465 -----MRKIIILFALT-----PFSWSKPSTPSLQPQ----- 28

TcB\_XP\_008196467 -----MHKITFLCALTL-----PLSWSKPNTSSLQ----- 26

\*TcB\_XP\_968689 -----MQKLLLLCALL-----PLSWTKPNAS----- 22

TcB\_XP\_968767 -----MQKIIILCALL-----PLSWSNPNVTL----- 23

TmB23 -----MICPLLVSVLSLV-----SPCLQE-EIQMTRHE----- 29

TmB22 -----MNYSLVSTLILXV-----LFTTXVTLISPRRS----- 28

TmB19 -----MNYIIVSTLLCLTL-----LDTPATLASSRRS----- 28

TmB20 -----MKIFLSFVVLVAVL-----SASLAEIDV--LSSE----- 28

TcB\_XP\_974244 -----MYFLIFLLLASI-----SVSRAEIDI--QSQD----- 26

TmB33 -----MKCVLLCIVVLASV-----ALSYGGVKLHPLSDE----- 30

TcB\_XP\_974298 -----MKCVLLCAVVLATI-----ALSYGGLNPHPLSDE----- 30

TmB18 -----MKCVLLFVAVLGTV-----ALTHGGVRVHPLSDE----- 30

TcB\_NP\_001164205 -----MKYFLHFVAVLATV-----ALVYGGVHLHPLSDD----- 30

TmB17 -----MKNLAYIAVLCTAI-----STILAVNPLSKE----- 27

TcB\_XP\_974220 -----MRTLPIILTICTAA-----SLSVAVHPLSKE----- 27

HsCathB -----MWQLWASLCCLLVL-----ANARSRPSFHPVSDE----- 30

-----FINSINSKQST--WXAGR--N-----

90 100 110 120 130 140 150 160

TmB27 -----FIESINQKRTT--WVARR--N 44

TmB26 -----FIESINQKRST--WVARR--N 48

TmB25 -----FIESINQKRST--WVARR--N 44

TmB24 -----FIESINQKRST--WVARR--N 40

TcB\_XP\_966750 -----FINSINAQQST--WTAGR--N 44

TcB\_XP\_966663 -----FINAINQKHPS--WLAGP--N 42

TmB32 GVTPPP-IAAPIIGCTYEGTVYPIGKQLKKNKNVCKCERVGMS-GDMLCEQHRCIIEPTITDAINSDPSN-GWTASNYSE 156

TcB\_XP\_008195382 GLPPPPEPPSPILGCTYEGRVYPLNKQIKKNKNVCKCEKMGQNQADMLCEQHQLIEPSITEAINSNYANYGWSASNYSK 159

Papain -----DLTSTERLIQLFESWMLKHNKIYKNIDEKIYRFEIFKDNLYIDETNKKNNYSY-WLGLN--V 95

TmB28 -----FIDFINKNQSS--WRAGK--F 44

TcB\_XP\_008196465 -----LIQEINSRQTS--WKAG--- 43

TcB\_XP\_008196467 -----VIQEINSEQIS--WKAE--- 41

TcB\_XP\_968689 -----LINQINSQSSA--WTAGI--- 38

TcB\_XP\_968767 -----LINQINSQSS--WTARI--- 39

TmB23 -----LINFINTNQSN--WTAGD--N 45

TmB22 -----LINRVNIIQST--WVAGE--N 44

TmB19 -----FINRINNVSS--WVAGE--N 44

TmB20 -----FIDSINRIQSS--WVAGR--N 44

TcB\_XP\_974244 -----FIDSINQKQSH--WVARR--N 42

TmB33 -----FINEINSKQTT--WKAGR--N 46

TcB\_XP\_974298 -----FINAINSCKTT--WKAGR--N 46

TmB18 -----FIASINNQKTT--WKAGR--N 46

TcB\_NP\_001164205 -----FINRINSRKST--WKAGR--N 46

TmB17 -----FIQSINDAQST--WKAGP--N 43

TcB\_XP\_974220 -----FIQQINEKQST--WKAGP--N 43

HsCathB -----LVNYVKNRNTT--WQAGH--N 46



|                  | 170                                                                               | 180 | 190 | 200 | 210 | 220 | 230 | 240 |
|------------------|-----------------------------------------------------------------------------------|-----|-----|-----|-----|-----|-----|-----|
|                  | FPEN-TPIEXLKRLNGFLG-DPDPXYKLP-LKVHKXDX-NAIPESFDAREKWPQC-DSIGNIRDQSGSCSWAFGAVEVM   |     |     |     |     |     |     |     |
| TmB27            | FPED-TPIEQLKRLNGALD-DLRHKYQVK-LKVHRVNV-SAIPDTFDGRTYWSQC-ESLKDIRNQGNGCGSWVFGGVEAI  | 119 |     |     |     |     |     |     |
| TmB26            | FPED-TPIEQLRRLNGAIE-DPHYKSQIK-LKVHKVDV-SAIPDTFDGRTHWPQC-ESLKNIRNQGQCGSCWAFGSTTEAM | 123 |     |     |     |     |     |     |
| TmB25            | FPED-TPIEQLRRLNGAIE-DPHYKSQVK-LKVHKVDV-SAIPDTFDGRTHWPQC-ESLKNIRNQGQCGSCWAFGSTTEAM | 119 |     |     |     |     |     |     |
| TmB24            | FPED-TPIEELRRLNGAIE-DPHYKSQLK-LKVHKVNA-SEIPDTFDGRTYWPQC-ESLKTIRNQGCGSCWAFSTVEPM   | 115 |     |     |     |     |     |     |
| TcB_XP_966750    | FPED-TPIEHLKRLNGALI-TPDLVGKNQ-THVINVIP-EAIPETFDGRTHWSQC-PSLKNIRNQGNGCGSCWAFGSVEVM | 119 |     |     |     |     |     |     |
| TcB_XP_966663    | FPPN-TPHSHLRSLNGARD-DPAFFTDTE-TKNVTI-P-EQIPQNFARIVWPQC-ESIRKIRNQGSCGSCWAFGAVETM   | 116 |     |     |     |     |     |     |
| TmB32            | FWGR-TLEEGIKLRLGTLQ-PQRFVMKMT-PVRHTYDP-QSFPREFESEMKWP---RWISGIQDQGWCGSWAISTAAVA   | 229 |     |     |     |     |     |     |
| TcB_XP_008195382 | FWGH-KLEEGIKLRLGTLQ-PQRFVMHMN-PVRRYIDP-NSLPREFDSEFKWP---GWMSEIQDQGWCGSWAITTAAVA   | 232 |     |     |     |     |     |     |
| Papain           | FADM-SNDEFKEKYTGSAI-GNYTTTELS-YEEVLNDGDVNIPEYVD---WRQK-GAVTPVKNQSGCGSCWAFSAVVTI   | 167 |     |     |     |     |     |     |
| TmB28            | FLENVTSRNFVHRYHRPVL---NVGNEVR-VKDCYLED-LHIPDSFDAREKWPACDVIIGNIRDQSGSCSWAFSSTGVM   | 119 |     |     |     |     |     |     |
| TcB_XP_008196465 | -----TNSLDIKSRLGFLGLHPDPDYKIQ-TKHHKIA--KSIPESFDAREKWPCKDVIKIRNQGTCGSCWAFASTEVM    | 114 |     |     |     |     |     |     |
| TcB_XP_008196467 | -----TNCLDIKSRLGFLGLHPDPNYKIQ-TKQHKISRIISIPEESFDAREKWPCKDVIKIRNQGNGCGSCWAFASTEVM  | 114 |     |     |     |     |     |     |
| TcB_XP_968689    | -----NPFDDIESRLGFLGIHPDPNFKPE-IKEPQATQ-NVIPETFDAREYWPCCADIIIGNIRNQGKCSWAFAAAEM    | 110 |     |     |     |     |     |     |
| TcB_XP_968767    | -----NPFDDIESRLGFLGIHPDPNFQLE-VLEWEPR-TVIPATFDAREYWPQCKDVIIGNIRNQGKCSWAFAAAEM     | 111 |     |     |     |     |     |     |
| TmB23            | FPEI-TSTEVLKRLNGVLGIDDPPEYQVT-LRRHKIGK-TKMPFEFFDARDAWAECGVIQYVVDQGGCGSWAFAAAEM    | 122 |     |     |     |     |     |     |
| TmB22            | FPDS-TTTEDLKHLNGFLGVDPDPDFTIQ-KKTHVIPR-NEIPARFDAREKWPCCRGIENIMDQGXCGSWAFSSAEM     | 121 |     |     |     |     |     |     |
| TmB19            | FPDS-IPTEHLHYLNGFLGIDPPDNFIIA-ENTHVIPR-NQIPAEFDAREAWPECRDIIENIMAQGACGSCWAFASTEVM  | 121 |     |     |     |     |     |     |
| TmB20            | FPEN-TTNEYLYKLNGLFGLHPDPNYKPP-VLVHTFNA-RDVPEESFDARTKWPNCDLSLNRIRDQGACGSCWAFASIESM | 120 |     |     |     |     |     |     |
| TcB_XP_974244    | FPEN-TTNEYLYKLNGLFGLHPDPNYMPE-KIKHNFNP-QDIPKTFDARKKWPKC-DSLNRIRDQSGCGSCWAFAAVETM  | 118 |     |     |     |     |     |     |
| TmB33            | FDVN-TPISHVRRLLGVLP-KKANAPKLP-VKTHAVNL-DAIPESFDAREAWPECTSIIIGEIRDQASCGSCWAFGAVEAM | 122 |     |     |     |     |     |     |
| TcB_XP_974298    | FDIH-TPLANIKKLLGVLP-KKANARQLE-LKVHSDVD-NAIPESFDAREAWPECASIIIGDIRDQASCGSCWAFGAAEAM | 122 |     |     |     |     |     |     |
| TmB18            | FDVN-TPLPQIKKLLGVLP-KTENTPKLP-LKIHPGV-LDIPESFDAREAWPDCASIIIGEIRDQASCGSCWAFGAVEAM  | 122 |     |     |     |     |     |     |
| TcB_NP_001164205 | FDID-TPISHIKQLLGVLP-ETENTPKLP-KKIHSINA-QEIPDSFDAREAWPDCAPIIGNIRDQSTCGSCWAFGAVEAM  | 122 |     |     |     |     |     |     |
| TmB17            | FAEN-VDMYSIRRLMGV---HPHSKYHKPSIKTHQLDA-TAIPASFDARQEWPNCP-TIREIRDQSGCGSCWAFGAVEAM  | 117 |     |     |     |     |     |     |
| TcB_XP_974220    | FAEN-VPMSYIRRLMGV---PPNSKYHMPVSRHLLDA-MEIPDDFDARKQWPNCP-TIREIRDQSGCGSCWAFGAVEAM   | 117 |     |     |     |     |     |     |
| HsCathB          | FY-N-VDMGYLKRLCGTFLGGPKPPQVRM-FTED-----LKLPAESFDAREQWPQC-PTIKEIRDQSGCGSCWAFGAVEAI | 117 |     |     |     |     |     |     |

Occluding Loop



|                  | 250                                                                               | 260 | 270 | 280 | 290 | 300 | 310 | 320 |
|------------------|-----------------------------------------------------------------------------------|-----|-----|-----|-----|-----|-----|-----|
|                  | SDRLCIASNGTVKFEFSAEDLLSCCTD-CGD---GCN-GGYPARAWDYWINSQIVSGGDY---NSNEGQPYSCSA XV    |     |     |     |     |     |     |     |
| TmB27            | TDRICIATGGKVKFQFSAEDVLSCTD-CGD---GCD-GGYPYSTWTYWINSQIVSGGDY---QSQQGCQPYT---KSAFV  | 189 |     |     |     |     |     |     |
| TmB26            | TDRLCIATDGKVKFQFSPEDLLSCCKE-CGD---GCD-GGSSATAWAYWMNSQIVSGGDYQSQSQEGCQPYL---ESTFV  | 195 |     |     |     |     |     |     |
| TmB25            | TDRLCIATNGKV-----ACCTA-CGD---GCD-GGWPSSKSFQYWMSSQIVSGGDY---QSQQGCQPYA---KSAFD     | 179 |     |     |     |     |     |     |
| TmB24            | TDRLCIATNGTVKFEFSAEDLLSCCTD-CGK---GCQ-GGAPSKAWAYWKSSGIASGGDY---QSQQGCQPYA---KSAFI | 185 |     |     |     |     |     |     |
| TcB_XP_966750    | TDRLCIASKGKTKFEFSADDLLACCTA-CGK---GCD-GGAPYRAFEYVWAKGIVSGGDY---NSNEGQPYE---GSAFL  | 189 |     |     |     |     |     |     |
| TcB_XP_966663    | SDRLCIASNATKKFEFSAQDLLACCKE-CGH---GCG-GGYSRAWQYVWTDGIVSGGDF---NTSQQCHPYS---VQAFR  | 186 |     |     |     |     |     |     |
| TmB32            | SDRFAILSKGREQIMLSAQHLVSCDIR-GQQ---SCN-GGYLDRAWSYIRKFLV-----DEQCFPYTASNEKCKV       | 295 |     |     |     |     |     |     |
| TcB_XP_008195382 | SDRFAILSKGREKVTLSAQHLLSCDRR-GQQ---SCN-GGYLDRAWSYIRKIGLV-----DEQCFPYATNEKCRI       | 298 |     |     |     |     |     |     |
| Papain           | EGIIKIRTGNLN--EYSEQELLDCRR--SY---GCN-GGYPNSALQLVAQYGIHYRNTY---PYEGVQRY---CRSRE    | 232 |     |     |     |     |     |     |
| TmB28            | TDRLCIQSEGEVKFQFSPQDILSCCEN-CSNSTYGCAGGSSDRAWRYWTESGIVSGGDY---DSYQGCVFYQ---ESEFY  | 193 |     |     |     |     |     |     |
| TcB_XP_008196465 | TDRLCIGTKGETKVFVSPENLLTCCED-CRL---ECV-GGYTAKAWDYINEGIVSGGDY---NSSEGCQPYSC---KASFQ | 184 |     |     |     |     |     |     |
| TcB_XP_008196467 | TDRLCISSK-----D-CGC---GCK-GGYIKNAWDYINEGIVSGGDY---NSSEGCQPYSC---ESSFQ             | 167 |     |     |     |     |     |     |
| TcB_XP_968689    | SDRLCIATNGKVKIQLSPEDLIDCCHY-CGN---QCK-GGYTYAWNYFMTGLVSGGDY---NTSTGCQPYSC---ELNYY  | 180 |     |     |     |     |     |     |
| TcB_XP_968767    | SDRLCVATNGSVKFEFSPEDLINCCTE-CGK---KCK-GGYSYAWKYTSTGLVSGGDY---NTSRGCQPYSC---KSNFN  | 181 |     |     |     |     |     |     |
| TmB23            | SDRLCIATGGQDKVMSPEDLLQCCTD-CGL---GCD-GGYVNAKAWYWLTYGVVSGGDY---NSNTGCKPYSC---ALAYL | 192 |     |     |     |     |     |     |
| TmB22            | SDRLCIASNGTEKVFVSPEDLLECCVN-CRN---QCL-GGYMNAFQYWIKNVSGGDY---NSNLGCKPYSC---GSAYI   | 191 |     |     |     |     |     |     |
| TmB19            | SDRLCISSKATKKVFVSPEDLLECCTS-CRD---QCE-GGYINSAFKYWINNGVSGGDY---NSLGLCKPYSC---KEAHI | 191 |     |     |     |     |     |     |
| TmB20            | SDRICHSSGSAQFMFSPEDLLSCCTS-CGD---CG-GGYMSALDFYINEGIVSGGDV---NSNEGCRPYT---ADAHD    | 189 |     |     |     |     |     |     |
| TcB_XP_974244    | SDRICHSSGAKKFFFSADLLSCCTA-CGS---CS-GGYMAAFDFYIKQGVVSGGDL---NSNEGCRPYT---ADAHD     | 187 |     |     |     |     |     |     |
| TmB33            | SDRICHSDASVKVRI SAEDLNDCCYD-CGD---GCN-GGWPDLAWSYWSSTGIVTGGY---GVDEGCKAYSIKPCDHHV  | 195 |     |     |     |     |     |     |
| TcB_XP_974298    | SDRICHSNATVKVSI STEDLNTCCYE-CGD---GCN-GGWPAAEWAWAETGIVTGGY---ETKDGCKAYTVPPCEHHV   | 195 |     |     |     |     |     |     |
| TmB18            | SDRICHSNATVKVISAEDLTSCCVL-CGL---GCN-GGWPMAWLWYSDSGIVTGGY---GSHEGCRTYSIPECEHHV     | 195 |     |     |     |     |     |     |
| TcB_NP_001164205 | SDRICHSNATVKVNISAEDPLDCCTI-CGM---GCN-GGMPAMAWLHWTVNGIVTGGY---EDTNGCKAYSFAPCEHHV   | 195 |     |     |     |     |     |     |
| TmB17            | SDRVCIHSGKGINVHVSADDLVSCCVT-CGM---GCN-GGFPGAAWHYVWKTGIVSGGTY---GSHQGRPYEIPAPCEHHV | 190 |     |     |     |     |     |     |
| TcB_XP_974220    | SDRVCIHSGKAVNVRLSADDLVSCCYSCGM---GCN-GGFPGAAWHYVWVNGIVSGGSF---GSNQGCRPYEIPAPCEHHV | 190 |     |     |     |     |     |     |
| HsCathB          | SDRICHHTNAHVSVEVSAEDLLTCCGSMCGD---GCN-GGYPAAEAWNFWRKGLVSGGLY---ESHVGRPYSIPPCEHHV  | 191 |     |     |     |     |     |     |

Occluding Loop

|                  | DGT  | TPXCXKTC   | NTGYKTPYXQDKH   | FGSS      | XYXIS   | XNVXQIQTE   | IMTNG       | PVEASFXVY  | EDFYSYK     |             |
|------------------|------|------------|-----------------|-----------|---------|-------------|-------------|------------|-------------|-------------|
|                  | 330  | 340        | 350             | 360       | 370     | 380         | 390         | 400        |             |             |
| TmB27            | DNT  | TPECANTC   | NTNYTISYQQDKH   | FGVD      | HYSIA   | EDVEIQTEIL  | TNG         | PVEASYSVY  | GDFYSYD 253 |             |
| TmB26            | NGV  | TPECATTC   | RNXDYKTPXQDKH   | SATE      | HYQIA   | QNVEIQTEIL  | NNG         | PVSASYTVY  | DDFYNYG 259 |             |
| TmB25            | DYI  | TPKCATTC   | NTGYKTSYQQDKH   | FGTQ      | HYRIA   | QNVQIQTEI   | INNG        | PVSASYTVY  | EDFYNYD 243 |             |
| TmB24            | DGK  | TPACANTC   | NTDYKTPYQDKH    | FGID      | HYAIAK  | KDVLQIQTEIL | TNG         | PVSAMFGVY  | DDFYNY 250  |             |
| TcB_XP_966750    | NSV  | TPKCSTKC   | NSKYTTPYAKDKH   | YGTDF     | IYMTS   | KNVAEQTEI   | MNG         | PVVTHTMDVY | EDFYSYK 254 |             |
| TcB_XP_966663    | DST  | TPNCSSFCT  | NPKYQKNYSEDKR   | YGAR      | SYRIA   | KNIEIQIAE   | IMTSG       | PVQASYVVY  | DDFYSYQ 250 |             |
| TmB32            | LRK  | GGLAEAKC   | KLPELVDRRSKYK   | VAPAYRIG  | NETDIMH | DIMTSG      | PVQATMKVY   | HDFFTYK    | 356         |             |
| TcB_XP_008195382 | PRR  | GDLVTANC   | QLPTNVDRRSKYK   | VAPAYRVG  | NETDIMY | EILHSG      | PVQATMKVY   | HDFFTYK    | 359         |             |
| Papain           | KGP  | YAAKT      | DGVRQVQPYNE     | GAL       | LYSIA   | NQ          | PVSVVLEA    | AGKDFQLYR  | 278         |             |
| TmB28            | LKT  | KSPCMKSC   | NNPHYKISYAEDKH  | FGSD      | YYQVK   | PAEKCIQAE   | IMSNG       | PVEAIFALY  | EDFYFYK 257 |             |
| TcB_XP_008196465 | YAV  | ASKCVKAC   | QNDKYDVKYDDDKH  | YGDS      | FYTLE   | TNVTQIQTEIL | TNG         | PVMATFNVF  | EDIIYYK 248 |             |
| TcB_XP_008196467 | YAE  | ASECVKAC   | QNDKYDVNYDDDKH  | YGDS      | XYTLE   | TNVAQIQMEIL | TNG         | PVMAYYNVF  | EDFACHK 231 |             |
| TcB_XP_968689    | R-I  | TPPCNTTC   | QNDKYPIPVSDKH   | FGDS      | IYYIP   | QNETAIQNEIL | SGGGPVVA    | AFDVY      | GDFKIYR 244 |             |
| TcB_XP_968767    | DGV  | SPECSKTC   | QNTKYPTSYLNDRH  | FGDG      | TYYIL   | KNVTTIQQEIL | LRGGPVMA    | GFDVY      | EDFKLYR 246 |             |
| TmB23            | YKT  | TPPCQKRC   | QLNYNTPYEVDKS   | FALS      | IYKVS   | SEEEIQIME   | IMTNG       | PVMTTYTVF  | EDFYSYQ 255 |             |
| TmB22            | NGR  | VSTCTKNC   | QVGYTTIYNDKK    | FGGS      | VYGV    | SAVDQIQMEI  | MLNG        | PVVAGYQVY  | EDFYLYK 254 |             |
| TmB19            | NSR  | IPTCVKNC   | QTGYKTSYKDDK    | FGVS      | VYGV    | AIVEIQIMEI  | MLNG        | PVIAGYEVY  | EDFYLYK 254 |             |
| TmB20            | QGQ  | TPACTKSC   | RNGYSTSYSADKH   | YGSN      | DYVVS   | SAIDQIQYEV  | MTNG        | PIIVNFVVF  | QDFYNYV 252 |             |
| TcB_XP_974244    | KGV  | TPSCTKSC   | RKGYPTSYSDDKH   | YGSK      | DYIVD   | AGVSNIQYEV  | MTNG        | PIIVSFKVY  | QDFYNYG 250 |             |
| TmB33            | DGNL | GPC-GDIQRT | PACKKSC-DSTSDLE | EYKSDLR   | RGSA    | YSIP        | KSESQIQTE   | IMTNG      | PVEADYDVY   | SDFLTYK 266 |
| TcB_XP_974298    | EGDL | PAC-GDIVPT | PQCKKEC-DAGVDIE | EYKSDLR   | KGSA    | YQTS        | SDESQIQTE   | IMTNG      | PVEADFVY    | EDFLNYK 266 |
| TmB18            | DGDL | PAC-GDIQPT | PACQRVC-DADSDLE | YEPDLR    | TGSS    | YTVG        | GSVIQIQTEIL | TNG        | PVEASYEVY   | EDFLSYK 266 |
| TcB_NP_001164205 | DGDL | PPC-GPTKPT | PDCKKEC-DSGSSL  | TYQNDLT   | HGSN    | YGID        | PYPKQIQTE   | IMTNG      | PVEASFVY    | EDFLSYK 266 |
| TmB17            | NGTR | PPCTGDGNK  | TPSCKKVC-EKGYN  | VPYNKDRN  | FGKE    | AYSIS       | SDVQQIQKE   | IMTNG      | PVECAFIVY   | ADLLSYK 263 |
| TcB_XP_974220    | NGTR | PPCTGDDNK  | TPSCKQCC-EKGYN  | VPYKDKN   | FGKE    | AYSIS       | SEVQQIQKE   | IMTNG      | PVECAFVY    | EDLLSYK 263 |
| HsCathB          | NGSR | PPCTGEGD   | TPKCSKIC-EPGYS  | PITYKQDKH | YGYN    | SYSVS       | NSEKDIMAEI  | YKNG       | PVECAFVY    | SDFLLYK 263 |

|                  | SGVYQH  | VSGXYVGGH  | AVKILGWGT | ENGTP   | YWL      | VANSWGS  | WDGDLGGFFKIL | RGXNE      | CGIESNIXAGX     |                 |                 |            |            |           |
|------------------|---------|------------|-----------|---------|----------|----------|--------------|------------|-----------------|-----------------|-----------------|------------|------------|-----------|
|                  | 410     | 420        | 430       | 440     | 450      | 460      | 470          | 480        |                 |                 |                 |            |            |           |
| TmB27            | SGVYQH  | VDGKYAGNH  | AVKILGWGT | EDGTP   | YWL      | VANSWGGN | WGDLGGFFKIL  | RGADH      | LGIESNILGGT 321 |                 |                 |            |            |           |
| TmB26            | SGVYQH  | VSGDVAGAH  | AIKILGWGT | ENGTP   | YWL      | VANSWGDW | SSLDGGFFKIL  | RGXNE      | CGIESN 321      |                 |                 |            |            |           |
| TmB25            | SGVYQH  | LSGDESGSH  | AIKILGWGT | ENGTP   | YWL      | VANSWGDW | SSLDGGFFKIL  | RGXNE      | CGIESNIQAGT 311 |                 |                 |            |            |           |
| TmB24            | SGVYQH  | LSGNRSGNH  | GKILGWGT  | EDGTP   | YWL      | VANSWGTN | WAGLGGFFKIL  | RGKNS      | AGIELNVMGGT 318 |                 |                 |            |            |           |
| TcB_XP_966750    | SGVYQH  | VSGNSMGCH  | AVKIIGWTE | GKVP    | YWL      | IAN\$W   | GAKWADLDG    | FYKILRGKNH | CKIETYIYGGT 322 |                 |                 |            |            |           |
| TcB_XP_966663    | NGVYQH  | VLGNVSGRH  | SVKILGW   | RENGTD  | YWL      | VANSWGRD | WGLGGFFKFL   | RGXNE      | CDIESNILGGD 318 |                 |                 |            |            |           |
| TmB32            | TGIYKHS | PLSSADRT   | GYSVRIVG  | WGEEYS  | QGVK     | KYKVAN   | SWGRLWGD     | NGYFKI     | ARGTNE          | CEIESFVLGTW 430 |                 |            |            |           |
| TcB_XP_008195382 | RGIYRHS | PISTNDRT   | GYSVRIVG  | WGEEYS  | PEGL     | KKYK     | VAN\$W       | PEWGE      | NGYFRIL         | RGXNE           | CEIESFVLGTW 433 |            |            |           |
| Papain           | GGIFV   | G---PCGNKV | DHAVA     | AVGYGPN | YIL      | IKN\$W   | GTGWGE       | NGYIRIK    | RGTGNSY         | GVCGLY          | SSFYVPV 344     |            |            |           |
| TmB28            | DGVYTY  | TIGGLV     | SAHVKI    | IIGW    | VENGNP   | YWL      | AAAN\$W      | NCN        | WGLKGGFFK       | IRRGVDE         | CGIEQHVL        | LAGTAR 326 |            |           |
| TcB_XP_008196465 | SGVYYH  | VSGDCT     | XHVVK     | IIGW    | TGEGVP   | YWL      | IAN\$W       | GTW        | WGLGGFFK        | IKIRGTNE        | CAIEQEMA        | AGNVH 316  |            |           |
| TcB_XP_008196467 | SGVYYY  | KSGKFV     | GRH\$V    | KVIG    | WTGEGIP  | YWL      | IAN\$W       | GSEW       | GELGGFFK        | MRRGTNE         | CWIEQEM         | TAGKVH 300 |            |           |
| TcB_XP_968689    | DGVYIY  | TSGALF     | GRTAVK    | IIGW    | TENGWA   | YWL      | AAAN\$W      | GKDW       | GALGGFFK        | IRRGTNE         | CGFEE           | SI         | IAGQVR 313 |           |
| TcB_XP_968767    | EGVYVH  | TSGALL     | GSHAVK    | IIGW    | TENGWA   | YWL      | VANSW        | GKDW       | GALGGV          | FKIRRGTNE       | CKIEQ           | SI         | ITGHVR 315 |           |
| TmB23            | RGVYHH  | VAGKYM     | GCHAVK    | IIGW    | VENKIP   | YWIV     | VANSW        | GRW        | GALGGFFK        | ILRGVNH         | CGIEE           | Y          | IVSD 323   |           |
| TmB22            | KGVYKH  | VTGQKM     | GNHAVK    | IIGW    | TENGTP   | YWL      | VANSW        | GRN        | WGLGGFFK        | ILRGKNH         | CGIES           | N          | IVTAK 322  |           |
| TmB19            | KGVYQY  | VTGPKV     | GNHVK     | IIGW    | TENDTP   | YWL      | VANSW        | GRD        | WGLGGFFK        | ILRGKNH         | CDIEN           | Y          | ITAGK 322  |           |
| TmB20            | SGVYRH  | VSGESV     | GRHVK     | IIGW    | VENGMP   | YWL      | IAN\$W       | GSS        | WGDHG           | FFKML           | RGONE           | CGIEN      | Y          | PYAAM 319 |
| TcB_XP_974244    | SGVYHH  | VSGNYT     | GNHIVK    | IIGW    | TEKEQD   | YWL      | IAN\$W       | GSS        | WGEHG           | FFKIL           | RGKNE           | CGIEN      | N          | PYAVL 317 |
| TmB33            | SGVYQH  | VSGEAG     | GCHAVK    | IIGW    | VEDGTP   | YWL      | VANSW        | NES        | WGD             | KGYFK           | ILRGQDE         | CGIES      | D          | IIGGI 333 |
| TcB_XP_974298    | SGVYQQ  | TTGNYA     | GCHAIK    | IIGW    | VEDGTP   | YWL      | AAAN\$W      | NED        | WGD             | KGYFK           | ILRGQNE         | CGIES      | D          | IIGGI 333 |
| TmB18            | SGVYQH  | VSGEEG     | GCHAVK    | IIGW    | VEDGTP   | YWL      | VANSW        | NED        | WGD             | KGYFK           | ILRGQDE         | CGIEE      | D          | ITAGL 333 |
| TcB_NP_001164205 | SGVYQH  | LEGEYA     | GCHAIK    | IIGW    | VENDTP   | YWL      | VANSW        | NED        | WGD             | KGYFK           | ILRGXNE         | CGIEG      | S          | IVAGI 333 |
| TmB17            | SGVYQH  | VTGAEL     | GCHAIR    | ILGW    | VEKNTP   | YWL      | IAN\$W       | N          | SDWGD           | NGIFK           | ILRGKD          | CGIE       | S          | IVAGL 330 |
| TcB_XP_974220    | KGVYQH  | VKGEAL     | GCHAIR    | ILGW    | TEKGTGTP | YWL      | IAN\$W       | N          | SDWGD           | NGTFK           | ILRGED          | CGIE       | S          | IVAGI 330 |
| HsCathB          | SGVYQH  | VTGEM      | GCHAIR    | ILGW    | VENGTP   | YWL      | VANSW        | N          | TDWGD           | NGFFK           | ILRGQD          | CGIE       | S          | IVAGI 330 |

|                  | -----PKX-----                                           |     |
|------------------|---------------------------------------------------------|-----|
|                  | 490      500      510      520      530      540        |     |
| TmB27            | -----PKV                                                | 323 |
| TmB26            |                                                         | 321 |
| TmB25            | -----PKV                                                | 313 |
| TmB24            | -----PKV                                                | 320 |
| TcB_XP_966750    | -----PQV                                                | 324 |
| TcB_XP_966663    | -----PKI                                                | 320 |
| TmB32            | -----PEIENKLLLNEIRRIRYPK                                | 449 |
| TcB_XP_008195382 | -----AEVENKLLLRNEI                                      | 445 |
| Papain           | -----KN                                                 | 345 |
| TmB28            | LKTKTSSSS-----PWLLVALVSAGIVIAVMAIALFVKKKSMESVINYFRLKS   | 374 |
| TcB_XP_008196465 | IGGRETTHKA-----PSSGGRIKGAIEFGVLIATILFRHIAIKPW           | 356 |
| TcB_XP_008196467 | IEGNERTEEMTTNATSKA-----PSSGFRTKGPEFRGVLIAIILLCQISIKCCLF | 350 |
| TcB_XP_968689    | --EGGSTSPTPVTFATVTPPTPGSGVRVAGCGIGLVL-SMMLFYLLK-----F   | 360 |
| TcB_XP_968767    | KDEKSSTSTTPV-----PGSGVRVVGSGVGAVL-AMVLFYLLK-----F       | 353 |
| TmB23            | -----KSHSSQMLPLPLLIV--TLPLVCKVVIFFAKF                   | 352 |
| TmB22            | -----SSSSSSYISSLLFILTAAAVNSTSFLSK                       | 349 |
| TmB19            | -----SSASSVYICYFLMLLATVINSTFFLSR                        | 348 |
| TmB20            | -----PRL                                                | 321 |
| TcB_XP_974244    | -----PKL                                                | 319 |
| TmB33            | -----PEL                                                | 335 |
| TcB_XP_974298    | -----PVV                                                | 335 |
| TmB18            | -----PNL                                                | 335 |
| TcB_NP_001164205 | -----PEL                                                | 335 |
| TmB17            | -----PPAQS                                              | 334 |
| TcB_XP_974220    | -----PKDSS                                              | 334 |
| HsCathB          | -----PRTDQYWEKI                                         | 339 |
