# Supplementary material for: Functional analysis of C1 family cysteine peptidases in the larval gut of Тenebrio molitor and Tribolium castaneum
Source: PubMed Central journal article supplement (PMC4336737; doi:10.1186/s12864-015-1306-x), 2015-02-14

A

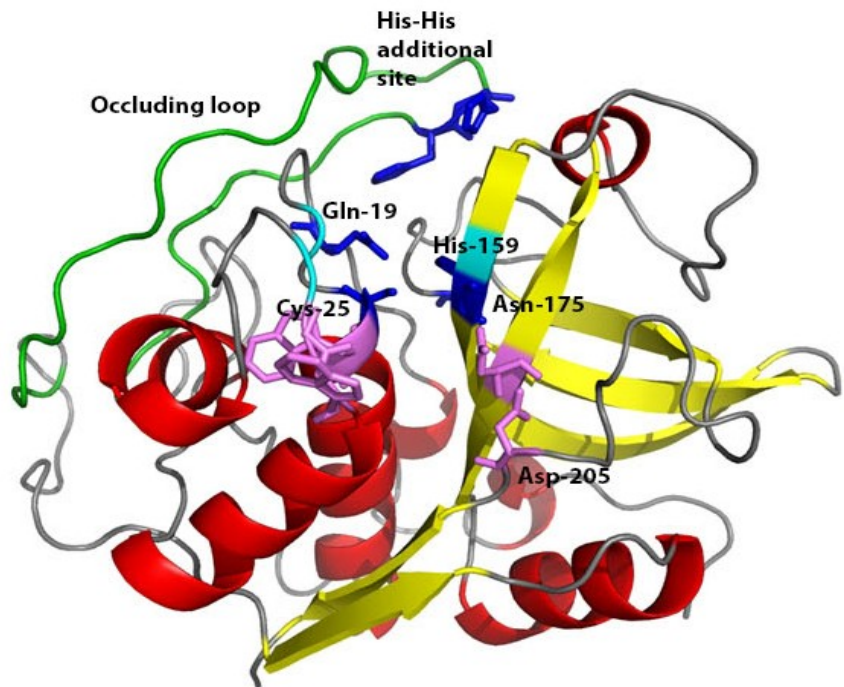

B

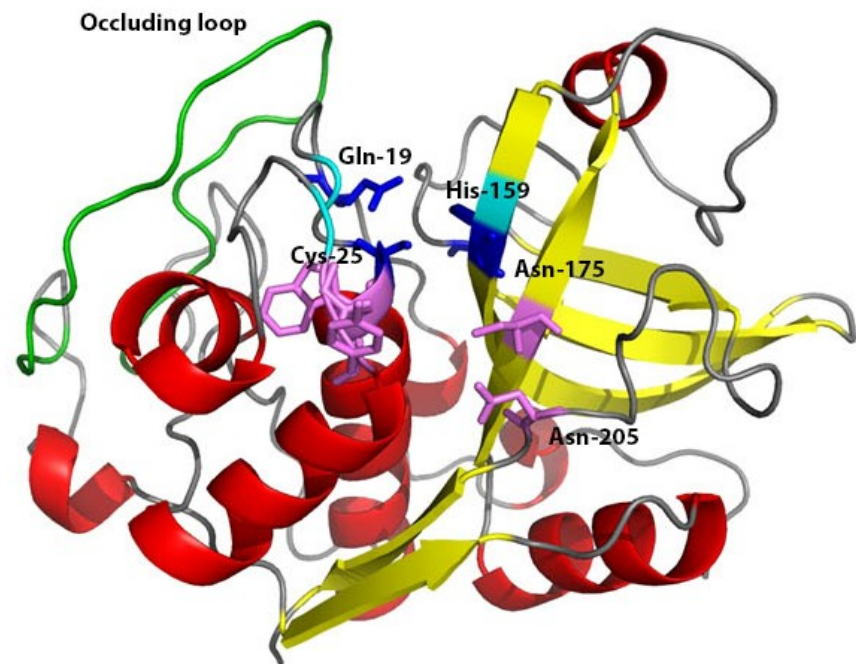

Supplement: 12864_2015_1306_MOESM4_ESM.pdf [file 12864_2015_1306_MOESM4_ESM.pdf]
