# Supplementary material for: Functional analysis of C1 family cysteine peptidases in the larval gut of Тenebrio molitor and Tribolium castaneum
Source: PubMed Central journal article supplement (PMC4336737; doi:10.1186/s12864-015-1306-x), 2015-02-14

**Supplemental Fig. S4.** Models of two possible conformations (**A** and **B**) of Arg in the P1 position of the substrate FRF in the active site of human cathepsin L [3OF8; Shenoy, Sivaraman 2011].

**A.**

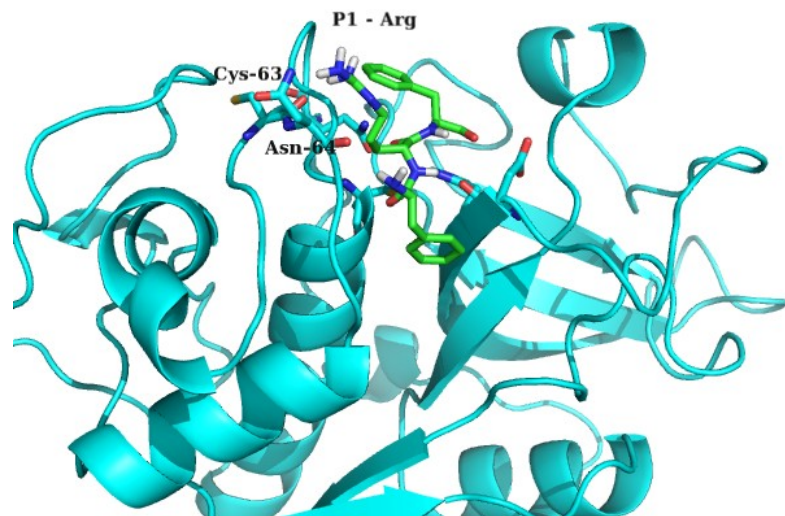

**B.**

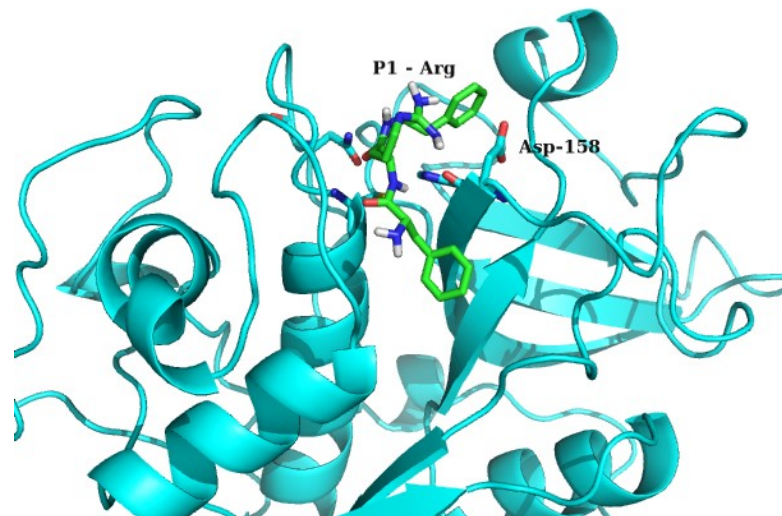

Supplement: 12864_2015_1306_MOESM5_ESM.pdf [file 12864_2015_1306_MOESM5_ESM.pdf]
