# Supplementary material for: Functional analysis of C1 family cysteine peptidases in the larval gut of Тenebrio molitor and Tribolium castaneum
Source: PubMed Central journal article supplement (PMC4336737; doi:10.1186/s12864-015-1306-x), 2015-02-14
Supplement: 12864_2015_1306_MOESM6_ESM.pdf [file 12864_2015_1306_MOESM6_ESM.pdf]

TmL2

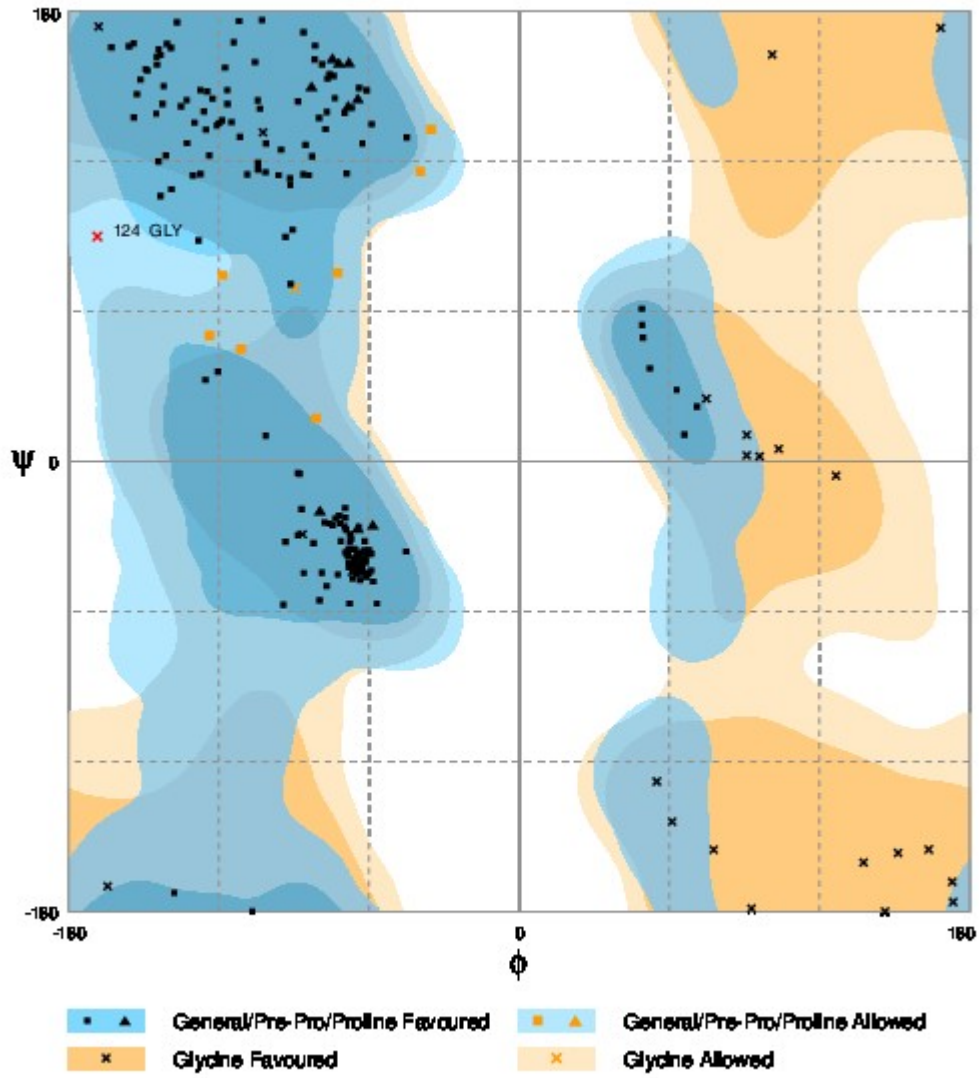

|                                       |                   |   |     |          |
|---------------------------------------|-------------------|---|-----|----------|
| Number of residues in favoured region | (~98.0% expected) | : | 213 | ( 95.9%) |
| Number of residues in allowed region  | ( ~2.0% expected) | : | 8   | ( 3.6%)  |
| Number of residues in outlier region  |                   | : | 1   | ( 0.5%)  |

TmL4

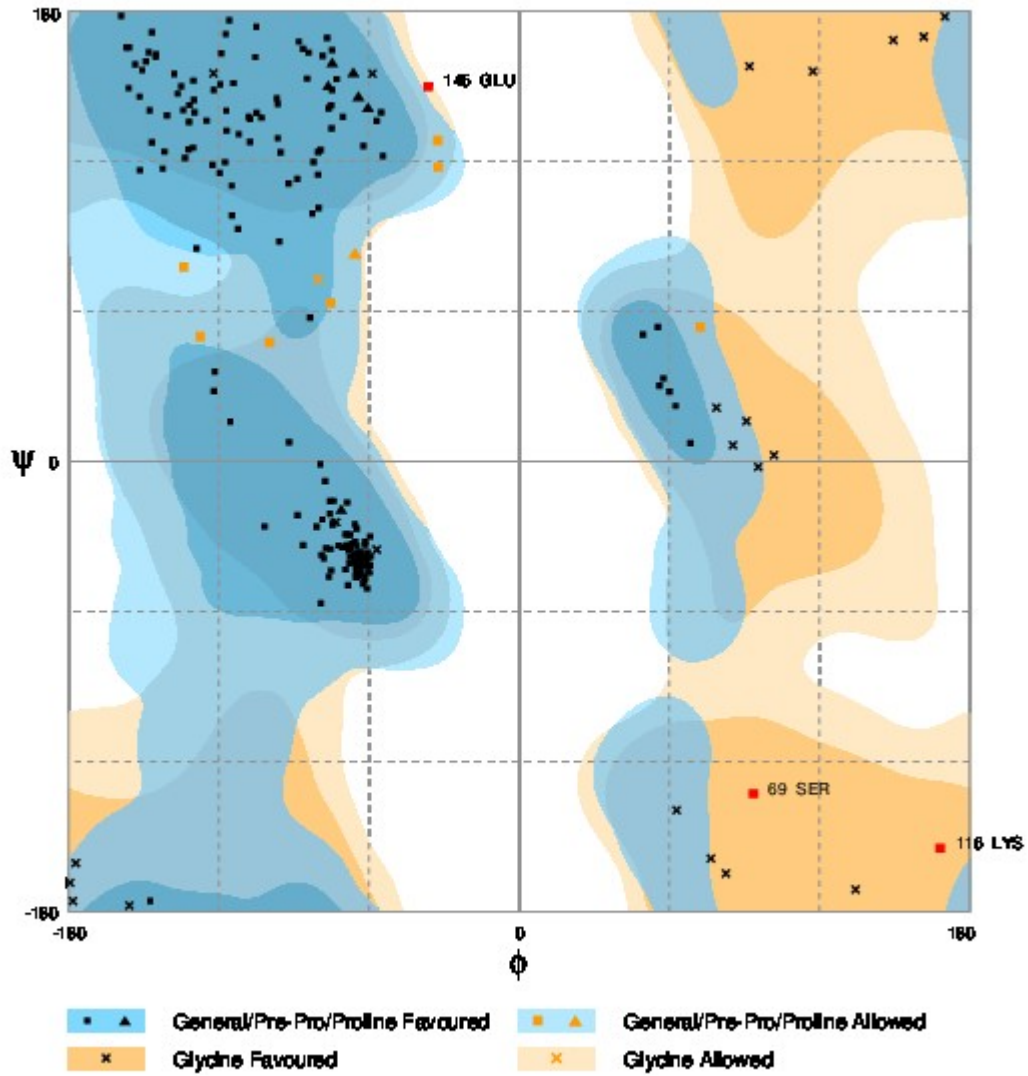

|                                       |                   |   |     |          |
|---------------------------------------|-------------------|---|-----|----------|
| Number of residues in favoured region | (~98.0% expected) | : | 207 | ( 94.5%) |
| Number of residues in allowed region  | ( ~2.0% expected) | : | 9   | ( 4.1%)  |
| Number of residues in outlier region  |                   | : | 3   | ( 1.4%)  |

TmL5

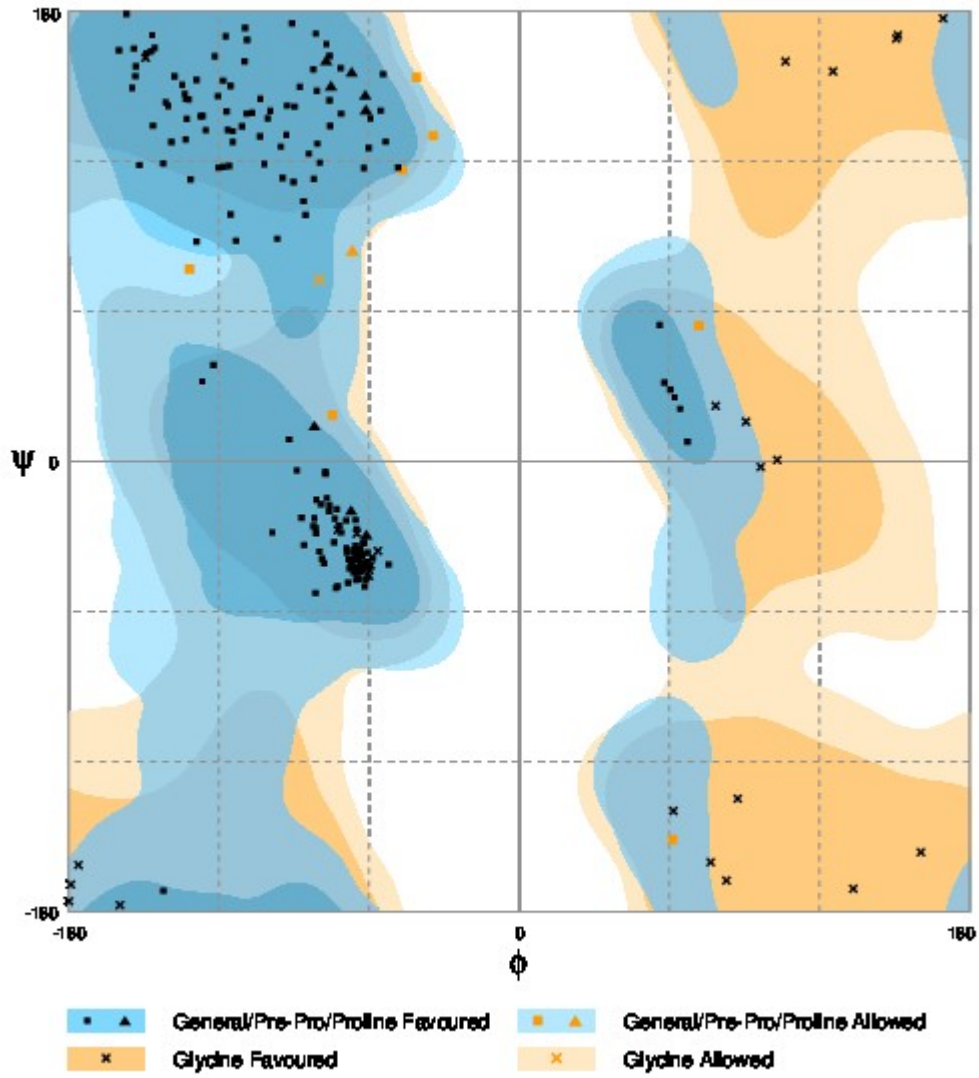

|                                       |                   |   |     |          |
|---------------------------------------|-------------------|---|-----|----------|
| Number of residues in favoured region | (~98.0% expected) | : | 211 | ( 95.9%) |
| Number of residues in allowed region  | ( ~2.0% expected) | : | 9   | ( 4.1%)  |
| Number of residues in outlier region  |                   | : | 0   | ( 0.0%)  |

TmL7

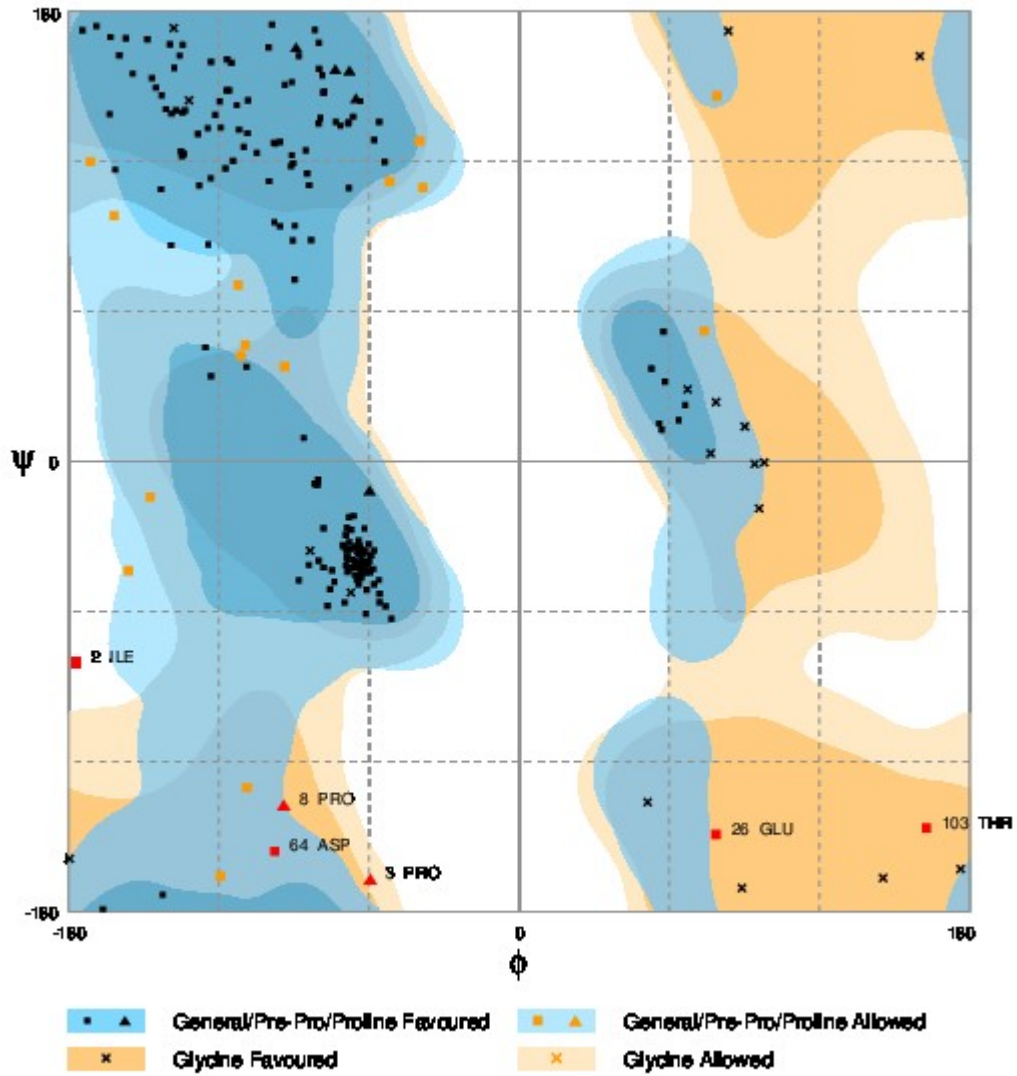

|                                       |                   |   |     |          |
|---------------------------------------|-------------------|---|-----|----------|
| Number of residues in favoured region | (~98.0% expected) | : | 204 | ( 90.7%) |
| Number of residues in allowed region  | ( ~2.0% expected) | : | 15  | ( 6.7%)  |
| Number of residues in outlier region  |                   | : | 6   | ( 2.7%)  |

TmL8

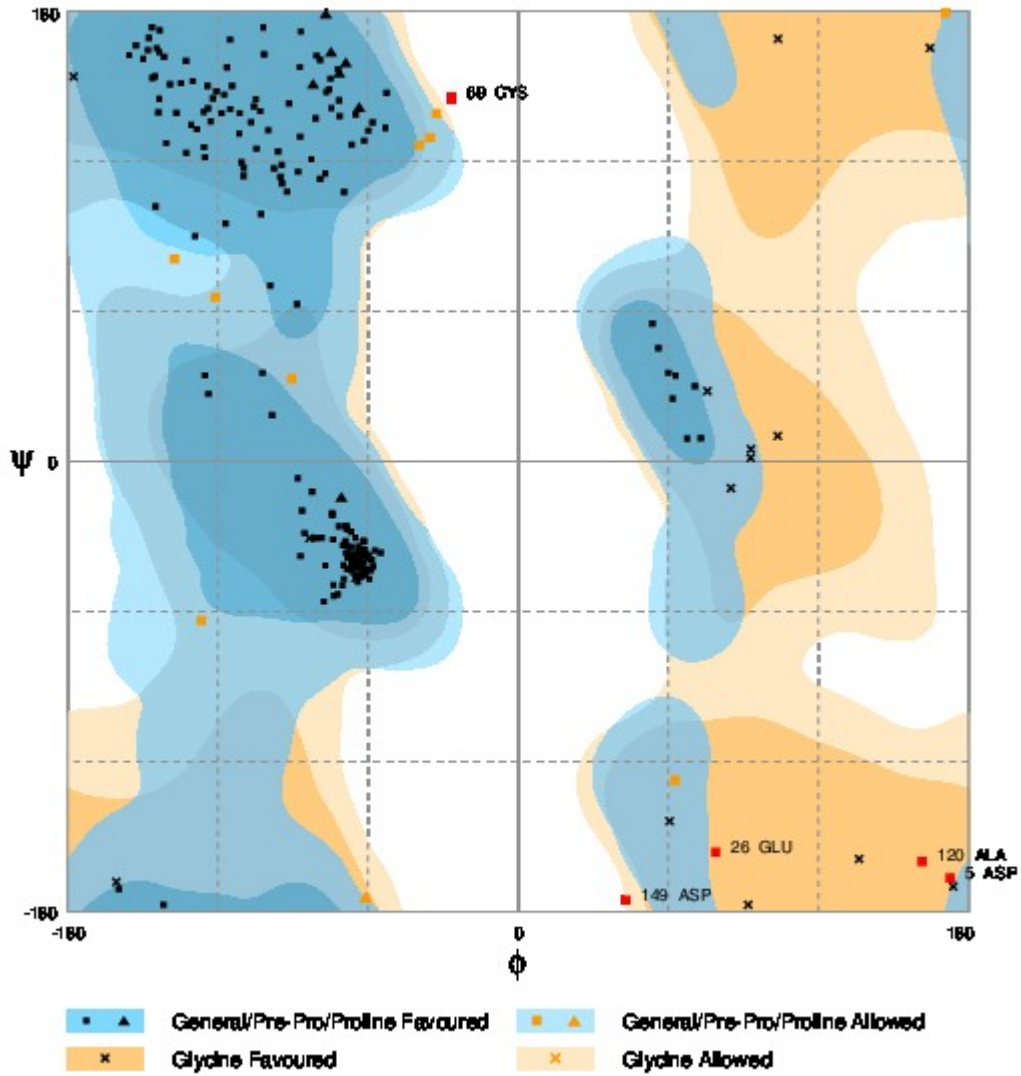

|                                       |                   |   |     |          |
|---------------------------------------|-------------------|---|-----|----------|
| Number of residues in favoured region | (~98.0% expected) | : | 210 | ( 93.3%) |
| Number of residues in allowed region  | ( ~2.0% expected) | : | 10  | ( 4.4%)  |
| Number of residues in outlier region  |                   | : | 5   | ( 2.2%)  |

TmL9

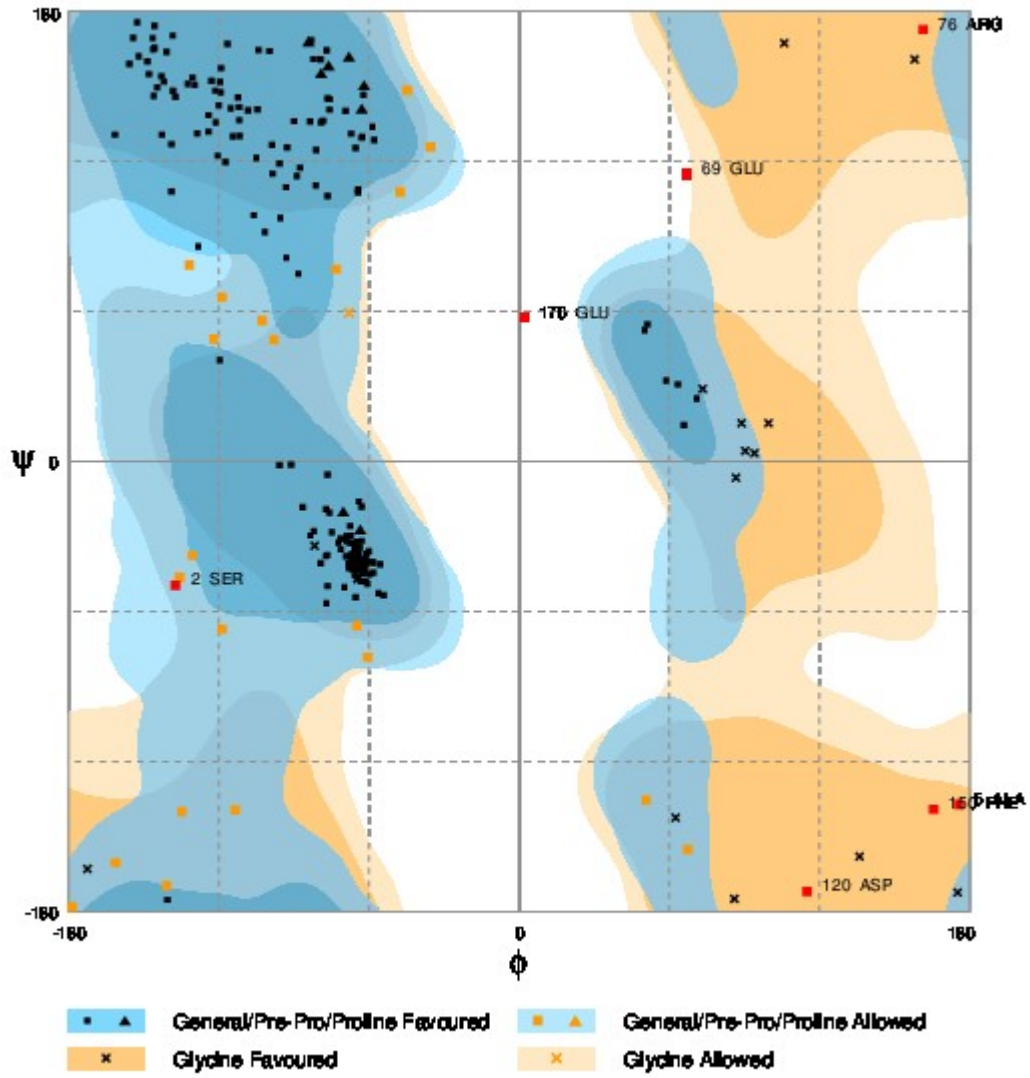

|                                       |                   |   |     |          |
|---------------------------------------|-------------------|---|-----|----------|
| Number of residues in favoured region | (~98.0% expected) | : | 196 | ( 87.1%) |
| Number of residues in allowed region  | ( ~2.0% expected) | : | 22  | ( 9.8%)  |
| Number of residues in outlier region  |                   | : | 7   | ( 3.1%)  |

TmL11

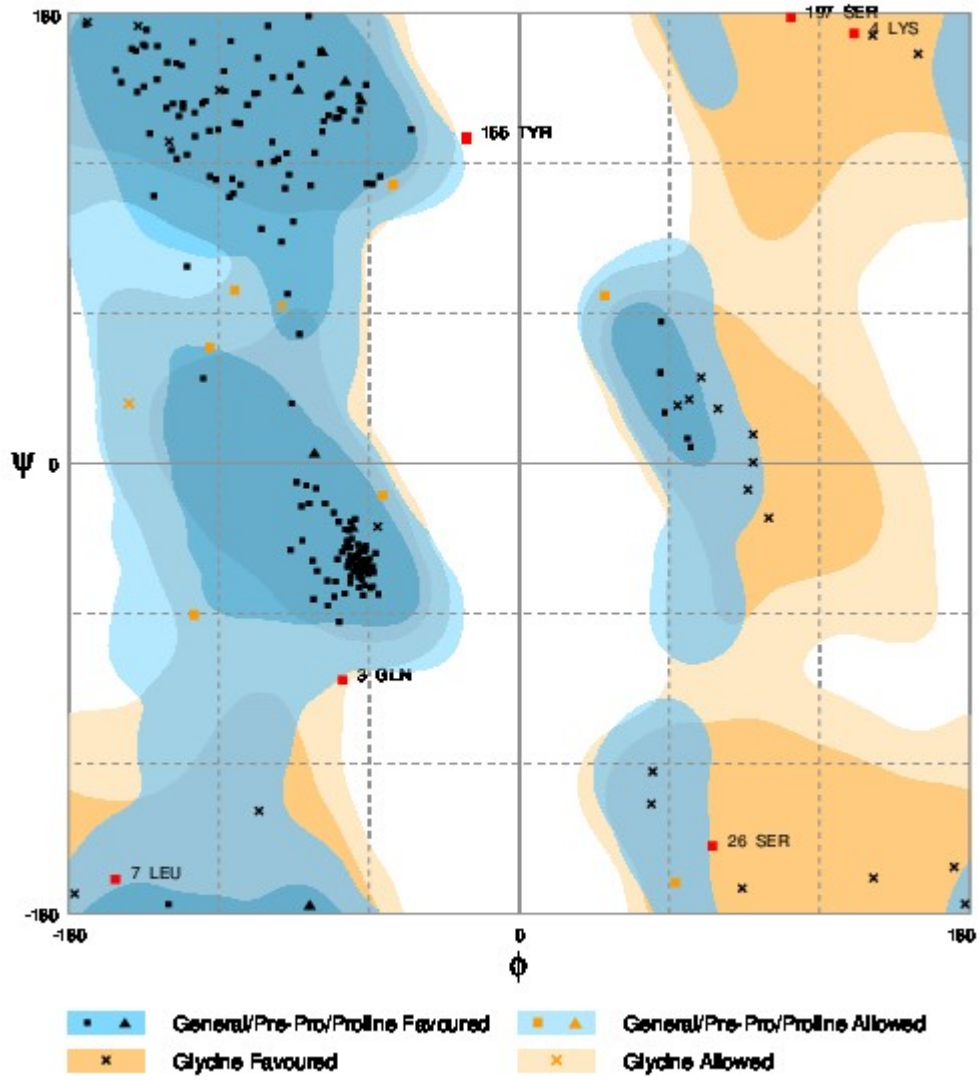

|                                       |                   |   |     |          |
|---------------------------------------|-------------------|---|-----|----------|
| Number of residues in favoured region | (~98.0% expected) | : | 209 | ( 93.3%) |
| Number of residues in allowed region  | ( ~2.0% expected) | : | 9   | ( 4.0%)  |
| Number of residues in outlier region  |                   | : | 6   | ( 2.7%)  |

TmL13

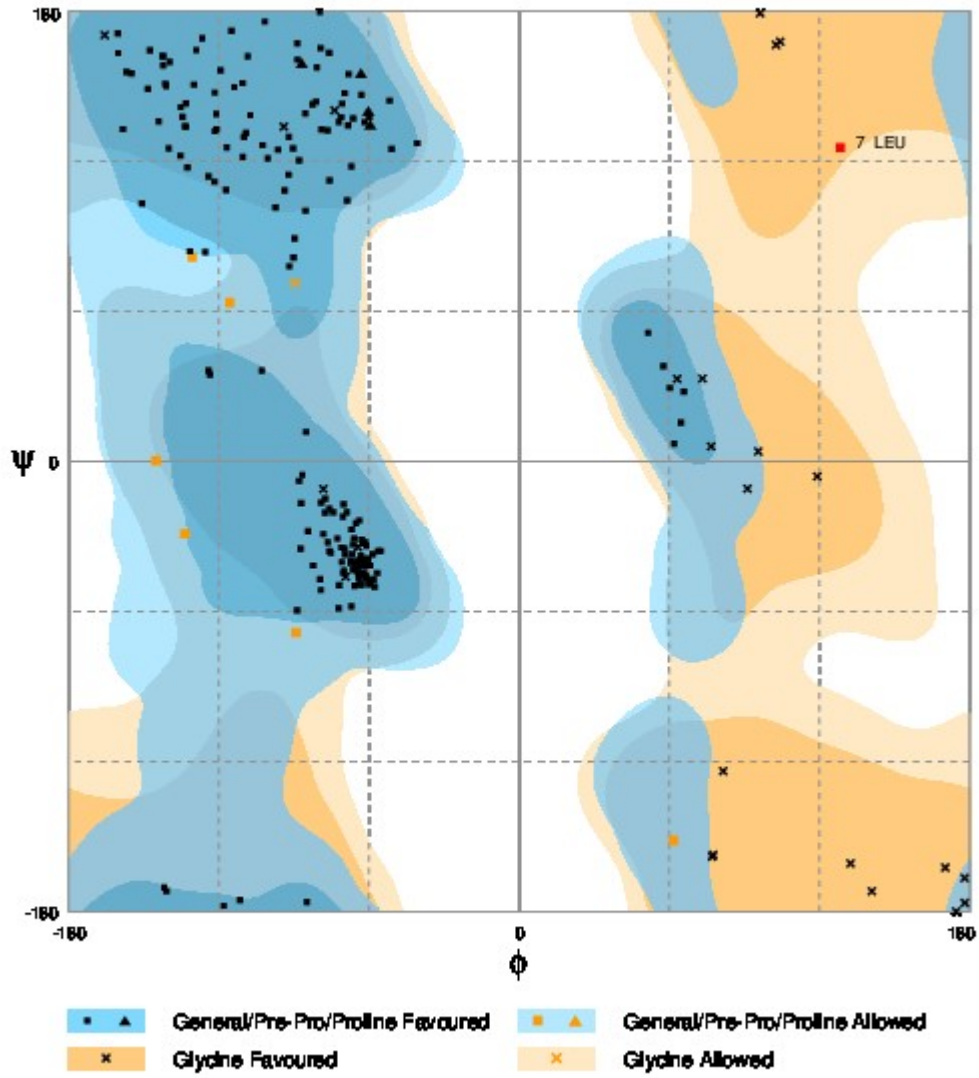

|                                       |                   |   |     |          |
|---------------------------------------|-------------------|---|-----|----------|
| Number of residues in favoured region | (~98.0% expected) | : | 210 | ( 96.3%) |
| Number of residues in allowed region  | ( ~2.0% expected) | : | 7   | ( 3.2%)  |
| Number of residues in outlier region  |                   | : | 1   | ( 0.5%)  |



TmB18

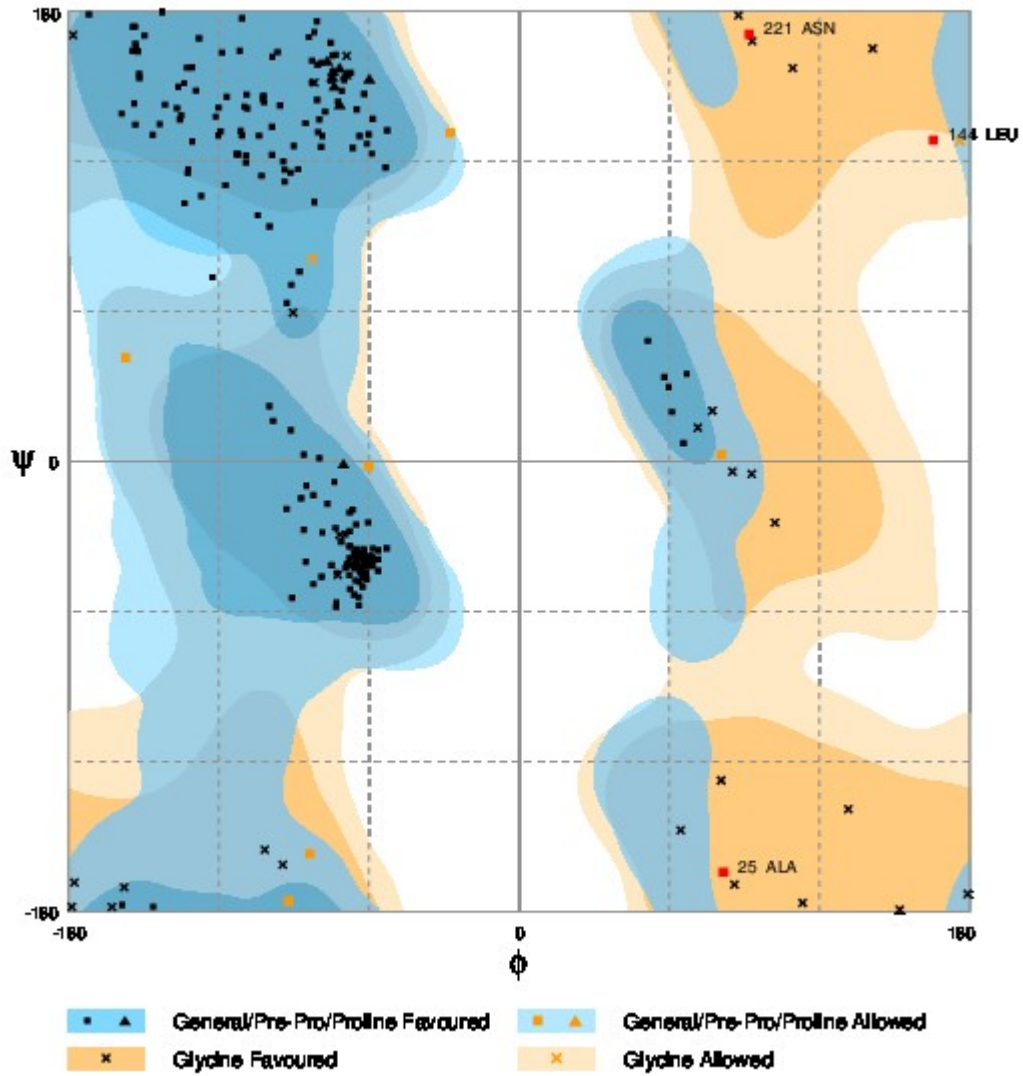

|                                       |                   |   |     |          |
|---------------------------------------|-------------------|---|-----|----------|
| Number of residues in favoured region | (~98.0% expected) | : | 239 | ( 95.6%) |
| Number of residues in allowed region  | ( ~2.0% expected) | : | 8   | ( 3.2%)  |
| Number of residues in outlier region  |                   | : | 3   | ( 1.2%)  |

TmB19

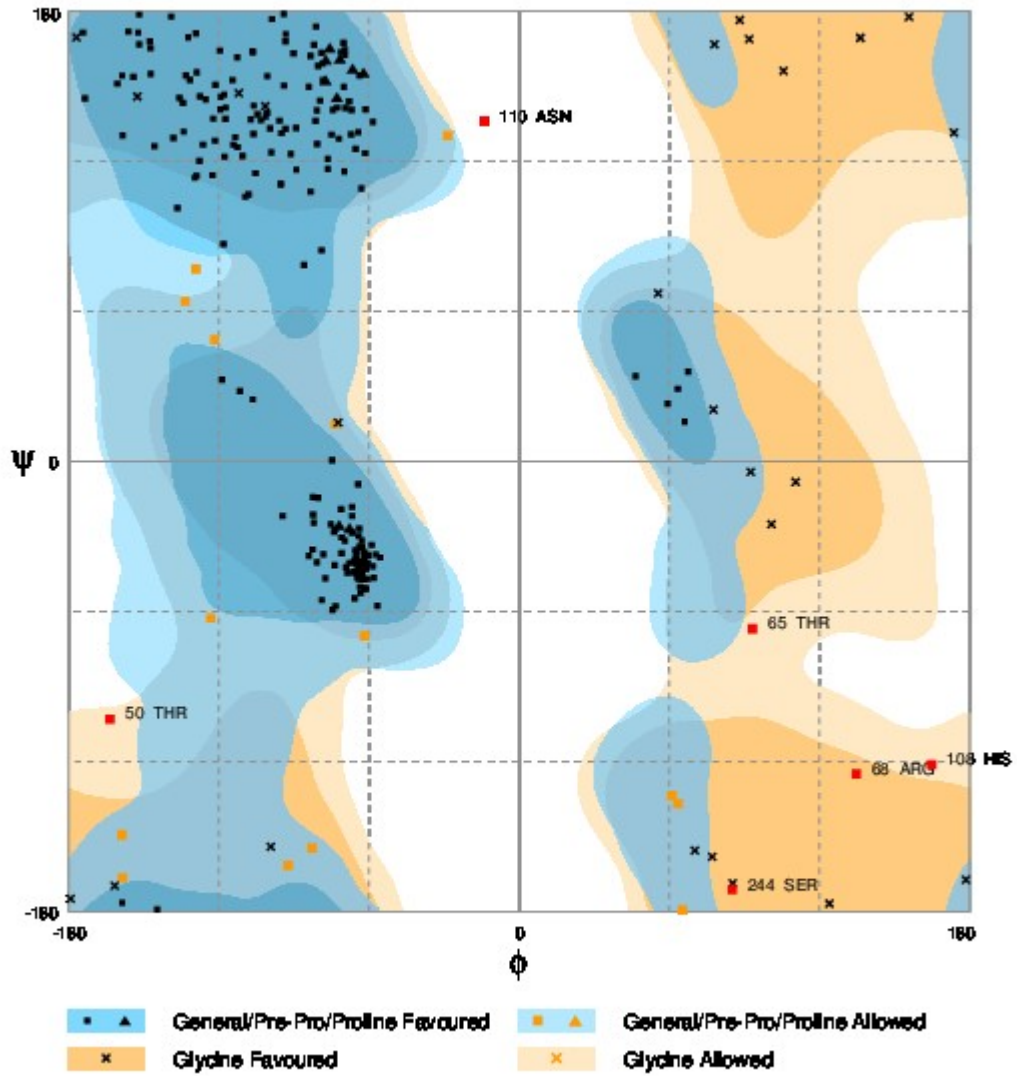

|                                       |                   |   |     |          |
|---------------------------------------|-------------------|---|-----|----------|
| Number of residues in favoured region | (~98.0% expected) | : | 244 | ( 92.4%) |
| Number of residues in allowed region  | ( ~2.0% expected) | : | 14  | ( 5.3%)  |
| Number of residues in outlier region  |                   | : | 6   | ( 2.3%)  |

TmB20

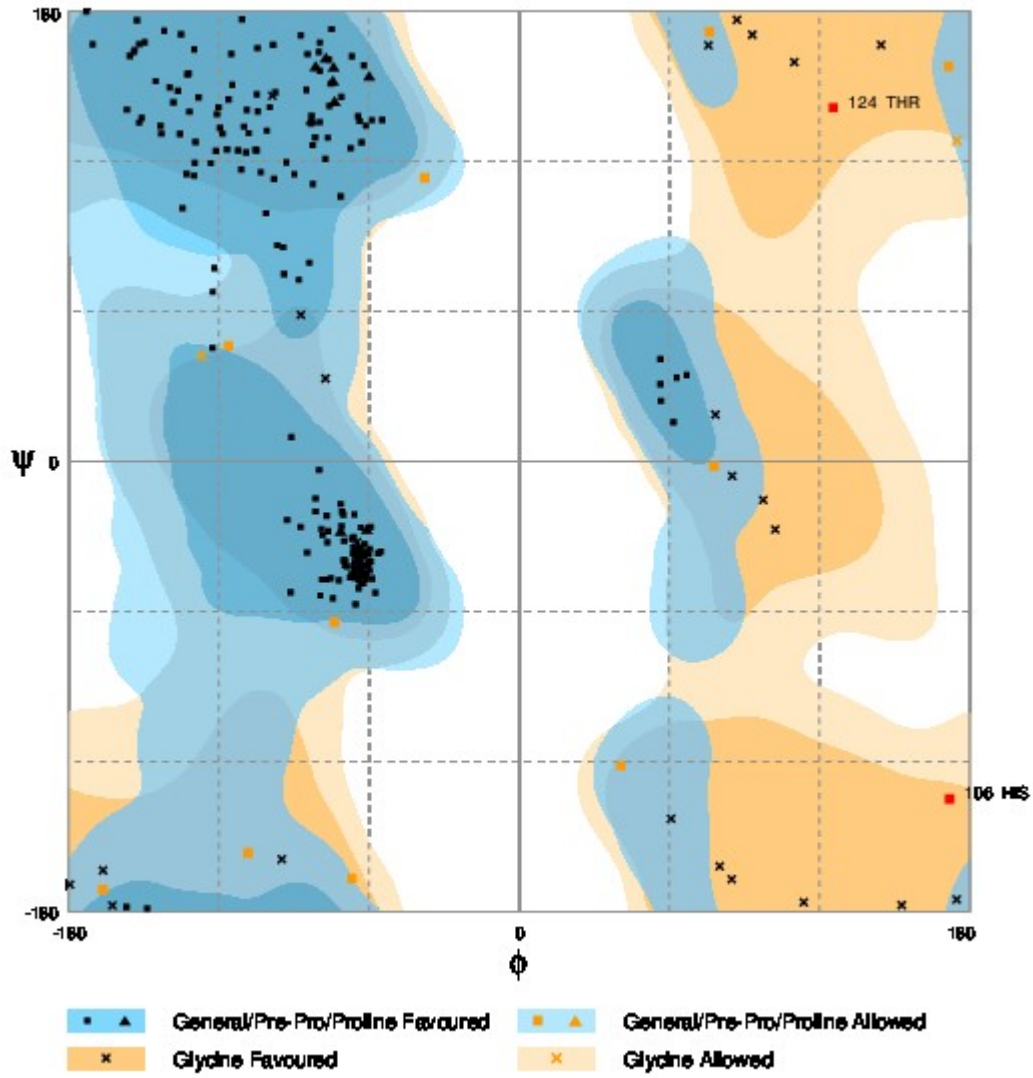

|                                       |                   |   |     |          |
|---------------------------------------|-------------------|---|-----|----------|
| Number of residues in favoured region | (~98.0% expected) | : | 223 | ( 94.1%) |
| Number of residues in allowed region  | ( ~2.0% expected) | : | 12  | ( 5.1%)  |
| Number of residues in outlier region  |                   | : | 2   | ( 0.8%)  |

TmB22

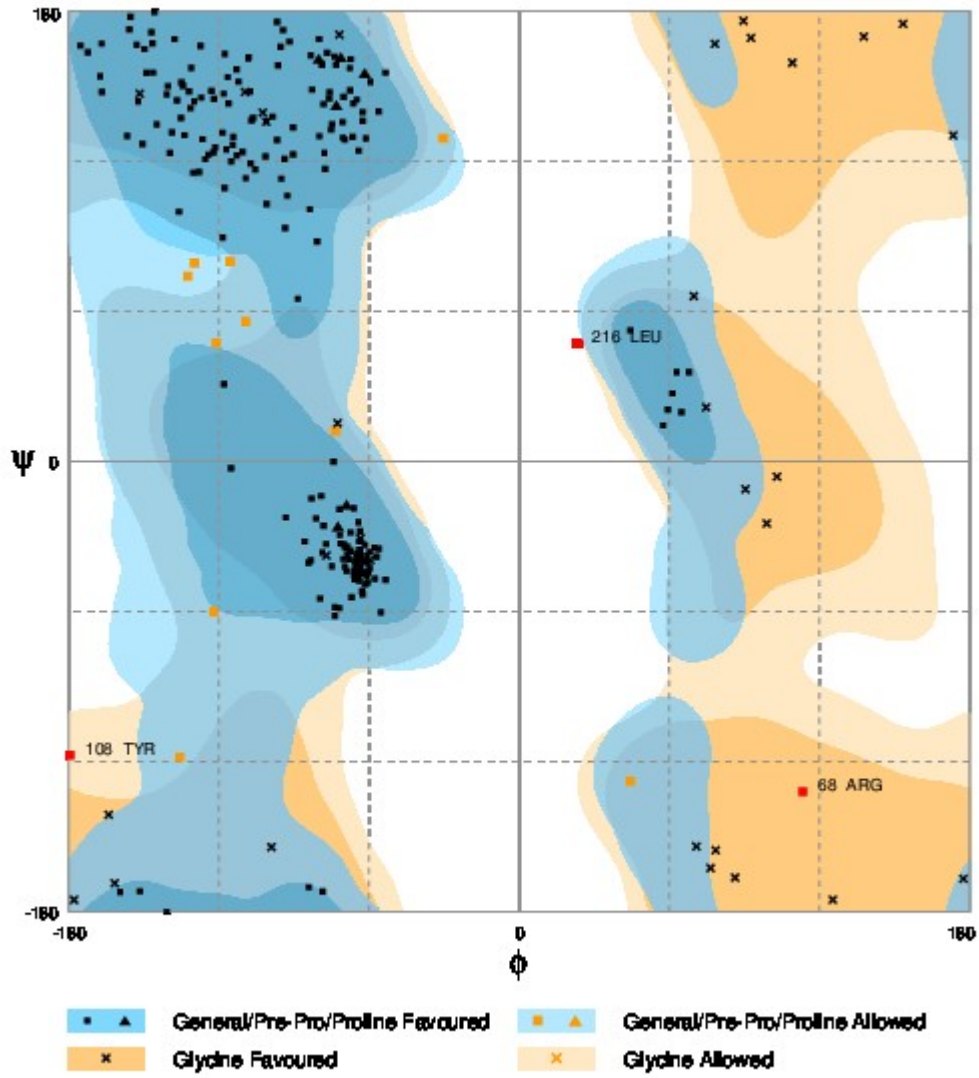

|                                       |                   |   |     |          |
|---------------------------------------|-------------------|---|-----|----------|
| Number of residues in favoured region | (~98.0% expected) | : | 252 | ( 95.1%) |
| Number of residues in allowed region  | ( ~2.0% expected) | : | 10  | ( 3.8%)  |
| Number of residues in outlier region  |                   | : | 3   | ( 1.1%)  |

TmB28

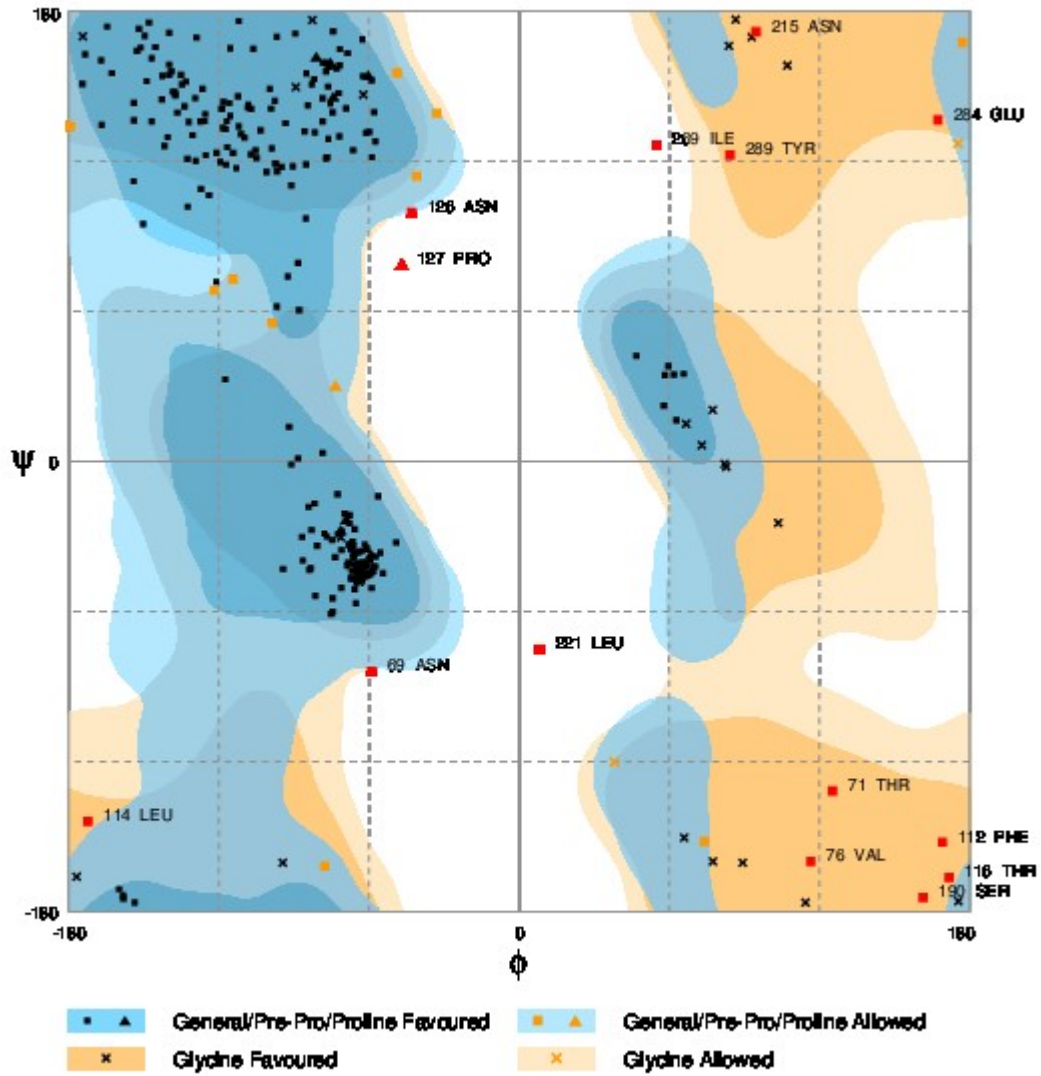

|                                       |                   |   |              |
|---------------------------------------|-------------------|---|--------------|
| Number of residues in favoured region | (~98.0% expected) | : | 265 ( 90.8%) |
| Number of residues in allowed region  | ( ~2.0% expected) | : | 13 ( 4.5%)   |
| Number of residues in outlier region  |                   | : | 14 ( 4.8%)   |

TmB33

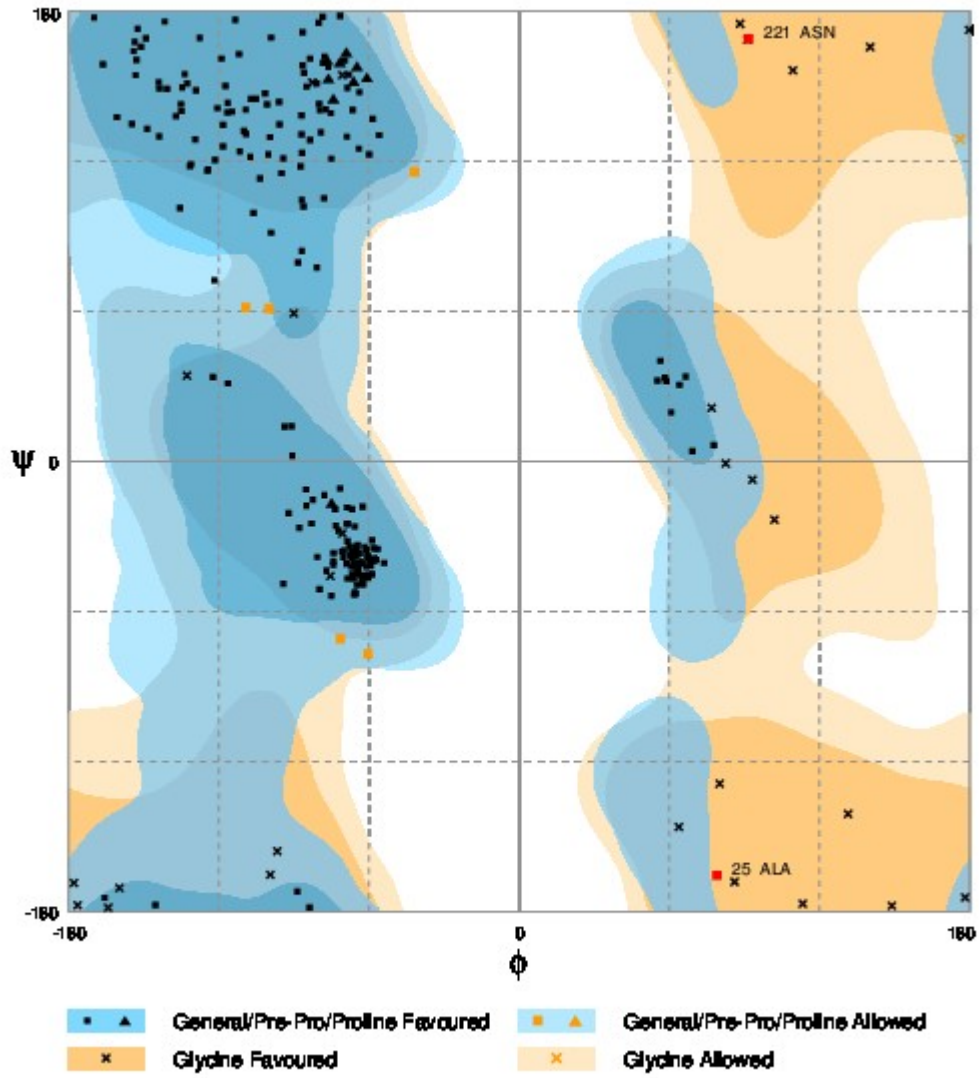

|                                       |                   |   |     |          |
|---------------------------------------|-------------------|---|-----|----------|
| Number of residues in favoured region | (~98.0% expected) | : | 242 | ( 96.8%) |
| Number of residues in allowed region  | ( ~2.0% expected) | : | 6   | ( 2.4%)  |
| Number of residues in outlier region  |                   | : | 2   | ( 0.8%)  |
