# Supplementary material for: Functional analysis of C1 family cysteine peptidases in the larval gut of Тenebrio molitor and Tribolium castaneum
Source: PubMed Central journal article supplement (PMC4336737; doi:10.1186/s12864-015-1306-x), 2015-02-14

## A. 3QJ3 vs TmL5a (mature cathepsin)

In 3QJ3 – catalytic cysteine is changed to serine

| # | Q-score | P-score | Z-score | RMSD  | Nalgn | Nsse | Ngaps | Seq-%  | Nmd | Nres-Q | Nsse-Q | Nres-T | Nsse-T | Query  | Target |
|---|---------|---------|---------|-------|-------|------|-------|--------|-----|--------|--------|--------|--------|--------|--------|
| 1 | 0.6929  | 26.95   | 17.25   | 0.199 | 222   | 12   | 0     | 0.9955 | 0   | 319    | 20     | 222    | 14     | 3qj3:A | TmL5a  |

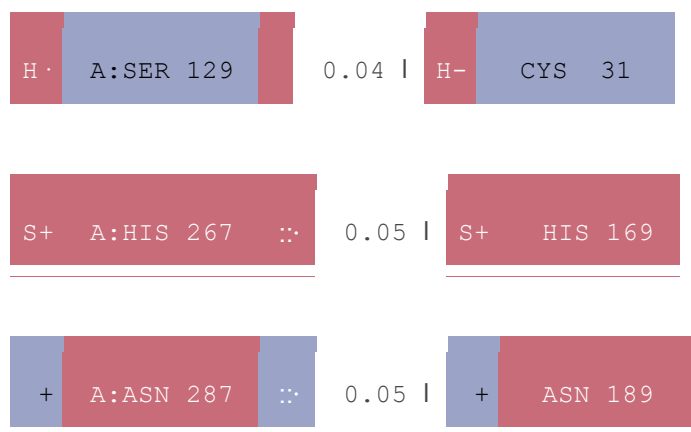

## B. 3QT4 vs TmL13a (mature cathepsin)

In 3QT4– catalytic cysteine is changed to serine

| ## | Q-score | P-score | Z-score | RMSD  | Naln | Nsse | Ngaps | Seq-%  | Nmd | Nres-Q | Nsse-Q | Nres-T | Nsse-T | Query  | Target |
|----|---------|---------|---------|-------|------|------|-------|--------|-----|--------|--------|--------|--------|--------|--------|
| 1  | 0.7213  | 37.53   | 18.62   | 0.173 | 220  | 13   | 0     | 0.9909 | 0   | 304    | 20     | 220    | 13     | 3qt4:A | TmL13a |

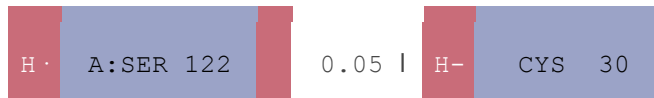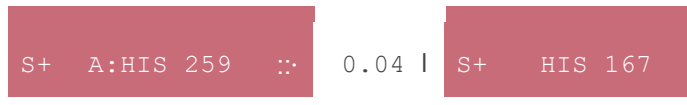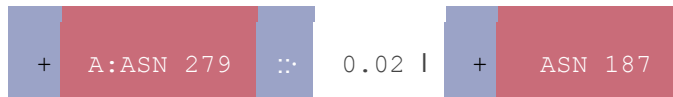

### C. 3OF8 (mature cathepsin L human) vs 1CS8 (procathepsin L human)

| ## | Q-score | P-score | Z-score | RMSD  | Naln | Nsse | Ngaps | Seq-%  | Nmd | Nres-Q | Nsse-Q | Nres-T | Nsse-T | Query  | Target |
|----|---------|---------|---------|-------|------|------|-------|--------|-----|--------|--------|--------|--------|--------|--------|
| 1  | 0.6522  | 31.92   | 17.18   | 0.469 | 216  | 14   | 1     | 0.9907 | 0   | 221    | 14     | 316    | 19     | 3of8:A | 1cs8:A |

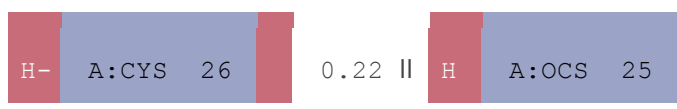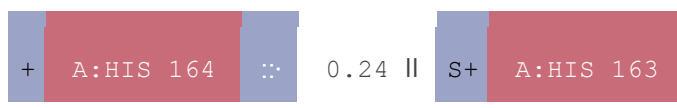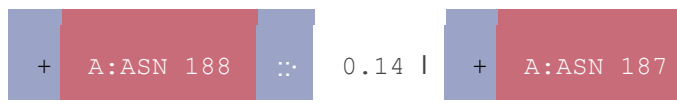

Supplement: 12864_2015_1306_MOESM7_ESM.pdf [file 12864_2015_1306_MOESM7_ESM.pdf]
